# Supplementary material for: Cytotoxic Pt(ii) complexes containing alizarin: a selective carrier for DNA metalation
Source: Royal Society of Chemistry journal article supplement (doi:10.1039/d3dt03889k), 2024-01-01
Supplement: d3dt03889k1.pdf [file d3dt03889k1.pdf]

## Cytotoxic Pt(II) complexes containing alizarine: a selective carrier for DNA metalation

Rossella Caligiuri,<sup>a±</sup> Lara Massai,<sup>e±</sup> Andrea Geri,<sup>e</sup> Loredana Ricciardi,<sup>c</sup> Nicolas Godbert,<sup>a,b</sup> Giorgio Facchetti,<sup>f\*</sup> Maria Giovanna Lupo,<sup>g</sup> Ilaria Rossi,<sup>h</sup> Giulia Coffetti,<sup>f</sup> Martina Moraschi,<sup>f</sup> Emilia Sicilia,<sup>d</sup> Vincenzo Vigna,<sup>d</sup> Luigi Messori,<sup>e</sup> Nicola Ferri,<sup>g,i</sup> Gloria Mazzone,<sup>d\*</sup> Iolinda Aiello,<sup>a,b,c\*</sup> Isabella Rimoldi<sup>f</sup>

<sup>a</sup> MAT-INLAB, LASCAMM CR-INSTM, Unità INSTM della Calabria, Dipartimento di Chimica e Tecnologie Chimiche, Università della Calabria, Ponte Pietro Bucci Cubo 14C, Arcavacata di Rende (CS), 87036, Italy.

<sup>b</sup> LPM-Laboratorio Preparazione Materiali, STAR-Lab, Università della Calabria, Via Tito Flavio, 87036 Rende (CS), Italy

<sup>c</sup> CNR-Nanotec, UoS di Cosenza, Dipartimento di Fisica, Università della Calabria, 87036 Rende (CS), Italy.

<sup>d</sup> Dipartimento di Chimica e Tecnologie Chimiche, Università della Calabria, Ponte Pietro Bucci Cubo 14C, Arcavacata di Rende (CS), 87036, Italy

<sup>e</sup> Department of Chemistry, University of Florence, Via della Lastruccia 3-13, 50019 Sesto Fiorentino, Italy

<sup>f</sup> Department of Pharmaceutical Sciences, University of Milan, Via Venezian 21, 20133 Milano, Italy

<sup>g</sup> Department of Medicine, University of Padova, Italy

<sup>h</sup> Department of Pharmaceutical and Pharmacological Sciences, University of Padova, Italy

<sup>i</sup> Veneto Institute of Molecular Medicine, Padua, Italy

± These authors equally contributed to the work.

### Table of Contents

**Figure S1.** <sup>1</sup>H- and <sup>13</sup>C-NMR spectra of compound **1b**.

**Figure S2.** <sup>1</sup>H- and <sup>13</sup>C-NMR spectra of compound **2b**.

**Figure S3.** <sup>1</sup>H- and <sup>13</sup>C-NMR spectra of compound **3b**.

**Figure S4.** <sup>1</sup>H- and <sup>13</sup>C-NMR spectra of compound **4b**.

**Figure S5.** <sup>1</sup>H- and <sup>13</sup>C-NMR spectra of compound **5b**.

**Figure S6.** <sup>1</sup>H- and <sup>13</sup>C-NMR spectra of compound **6b**.

**Figure S7.** <sup>1</sup>H- and <sup>13</sup>C-NMR spectra of compound **7b**.

**Figure S8.** <sup>1</sup>H- and <sup>13</sup>C-NMR spectra of compound **8b**.

**Figure S9.** <sup>1</sup>H- and <sup>13</sup>C-NMR spectra of compound **9b**.

**Figure S10.** <sup>195</sup>Pt-NMR of dichloride precursor **2a**.

**Figure S11.** <sup>195</sup>Pt-NMR of dichloride precursor **6a**.

**Figure S12.** <sup>195</sup>Pt-NMR of dichloride precursor **7a**.

**Figure S13.** HPLC of compound **2b** in presence of KI as internal standard (peak 1).

**Figure S14.** HPLC of compound **6b** in presence of KI as internal standard (peak 1).

**Figure S15.** HPLC of compound **7b** in presence of KI as internal standard (peak 1).

**Table TS1.**  $^1\text{H}$  and  $^{13}\text{C}$  chemical shift ( $\delta$ , *ppm*) computed in DMSO for the two possible isomers of complexes **3b-6b**.

**Table TS2.** The shortest H-H distance ( $\text{\AA}$ ) between N<sup>N</sup> and aliz ligands computed in DMSO for the depicted isomers *cis* and *trans* of complexes **3b-6b**, where H3 can be phenyl H (**3b**, **4b** and **6b**) or methyl H (**5b**).

**Figure S16.** NOESY bidimensional experiment of compound **5b**.

**Figure S17.** Optimized structure of complexes **1b-9b**.

**Table TS3.** Cartesian Coordinates of the optimized structures for the complexes.

**Figure S18.** Absorption spectra over time ( $t = 0, 3, 6,$  and  $24$  h) of Pt(II) complexes [(N<sup>N</sup>)Pt(aliz)] (A) **1b**, (B) **2b**, (C) **3b**, (D) **4b**, (E) **5b**, (F) **6b**, (G) **7b**, (H) **8b** and of (I) **9b** in DMSO/buffer solution (DMSO 0.5% v/v) at room temperature,  $1 \cdot 10^{-5}\text{M}$ .

**Figure S19.** TDDFT simulated absorption spectra of Pt(II) complexes [(N<sup>N</sup>)Pt(aliz)] **1b-2b** (A), **3b-6b** (B), **7b-9b** (C) in aqueous environment.

**Table TS4.** TDDFT calculated electronic excitation energies (eV), absorption wavelength (nm), oscillator strength ( $f$ ) and main configuration in water.

**Figure S20.** Natural Transition Orbitals (NTOs) for selected electronic transitions.

**Figure S21.** (A) Deconvoluted ESI-Q-TOF spectra of ODN with cisplatin; (B) Deconvoluted ESI-Q-TOF spectra of RNase with cisplatin in a 1:1 molecule to platinum ratio. All spectra were recorded at 24 h.

**Figure S22.** Binding study of GSH with compounds **2b**, **6b** and **7b** in 20 % physiological  $\text{D}_2\text{O}$  solution-DMSO- $d_6$ : stack plot of  $^1\text{H}$ -NMR for aliphatic region.

**Figure S23.** Free energy profiles for NAM attack to Pt<sup>II</sup> complexes **2b**, **6b**, **7b**, **2a**, **6a** and **7a**.

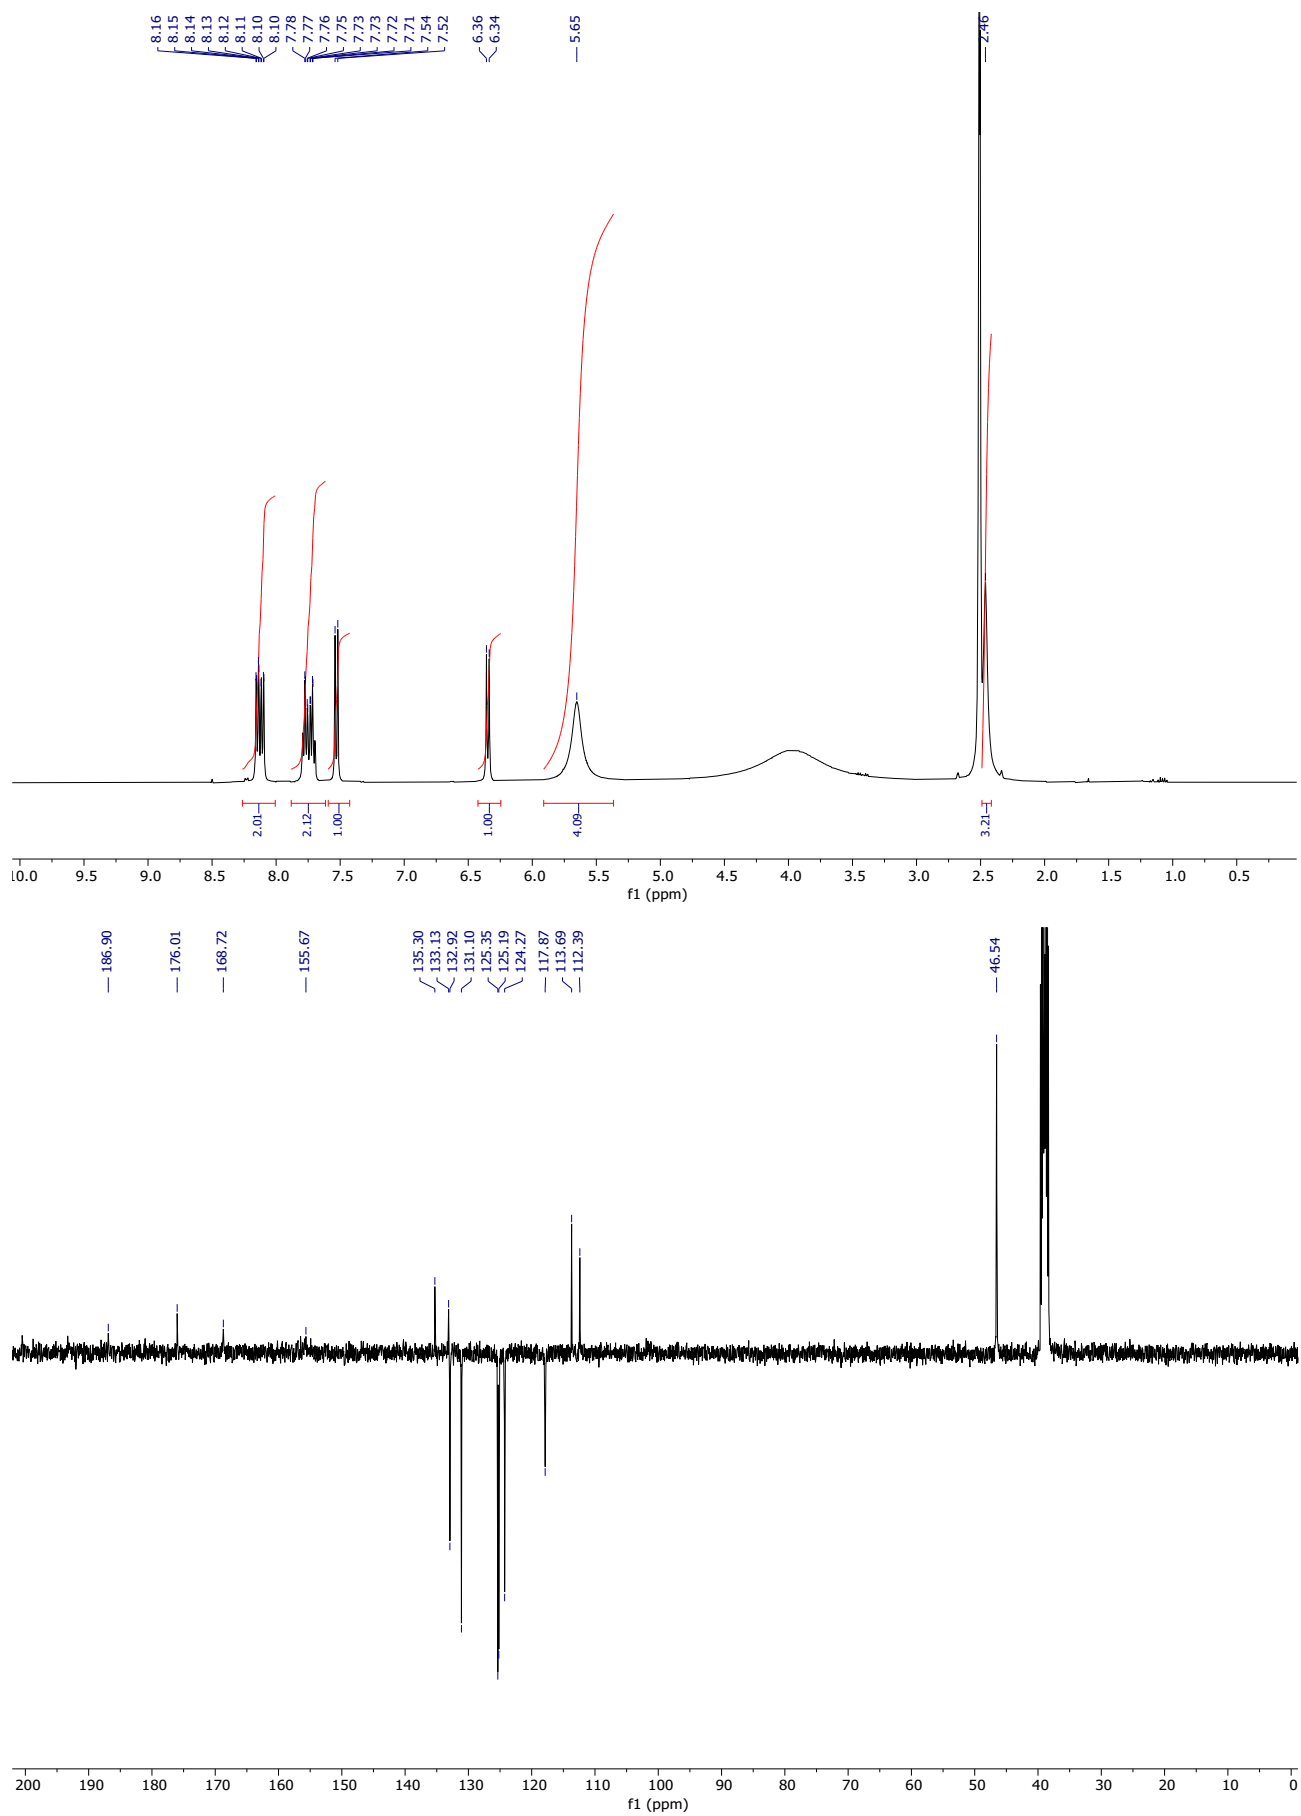

**Figure S1.** <sup>1</sup>H- and <sup>13</sup>C-NMR spectra of compound **1b**.

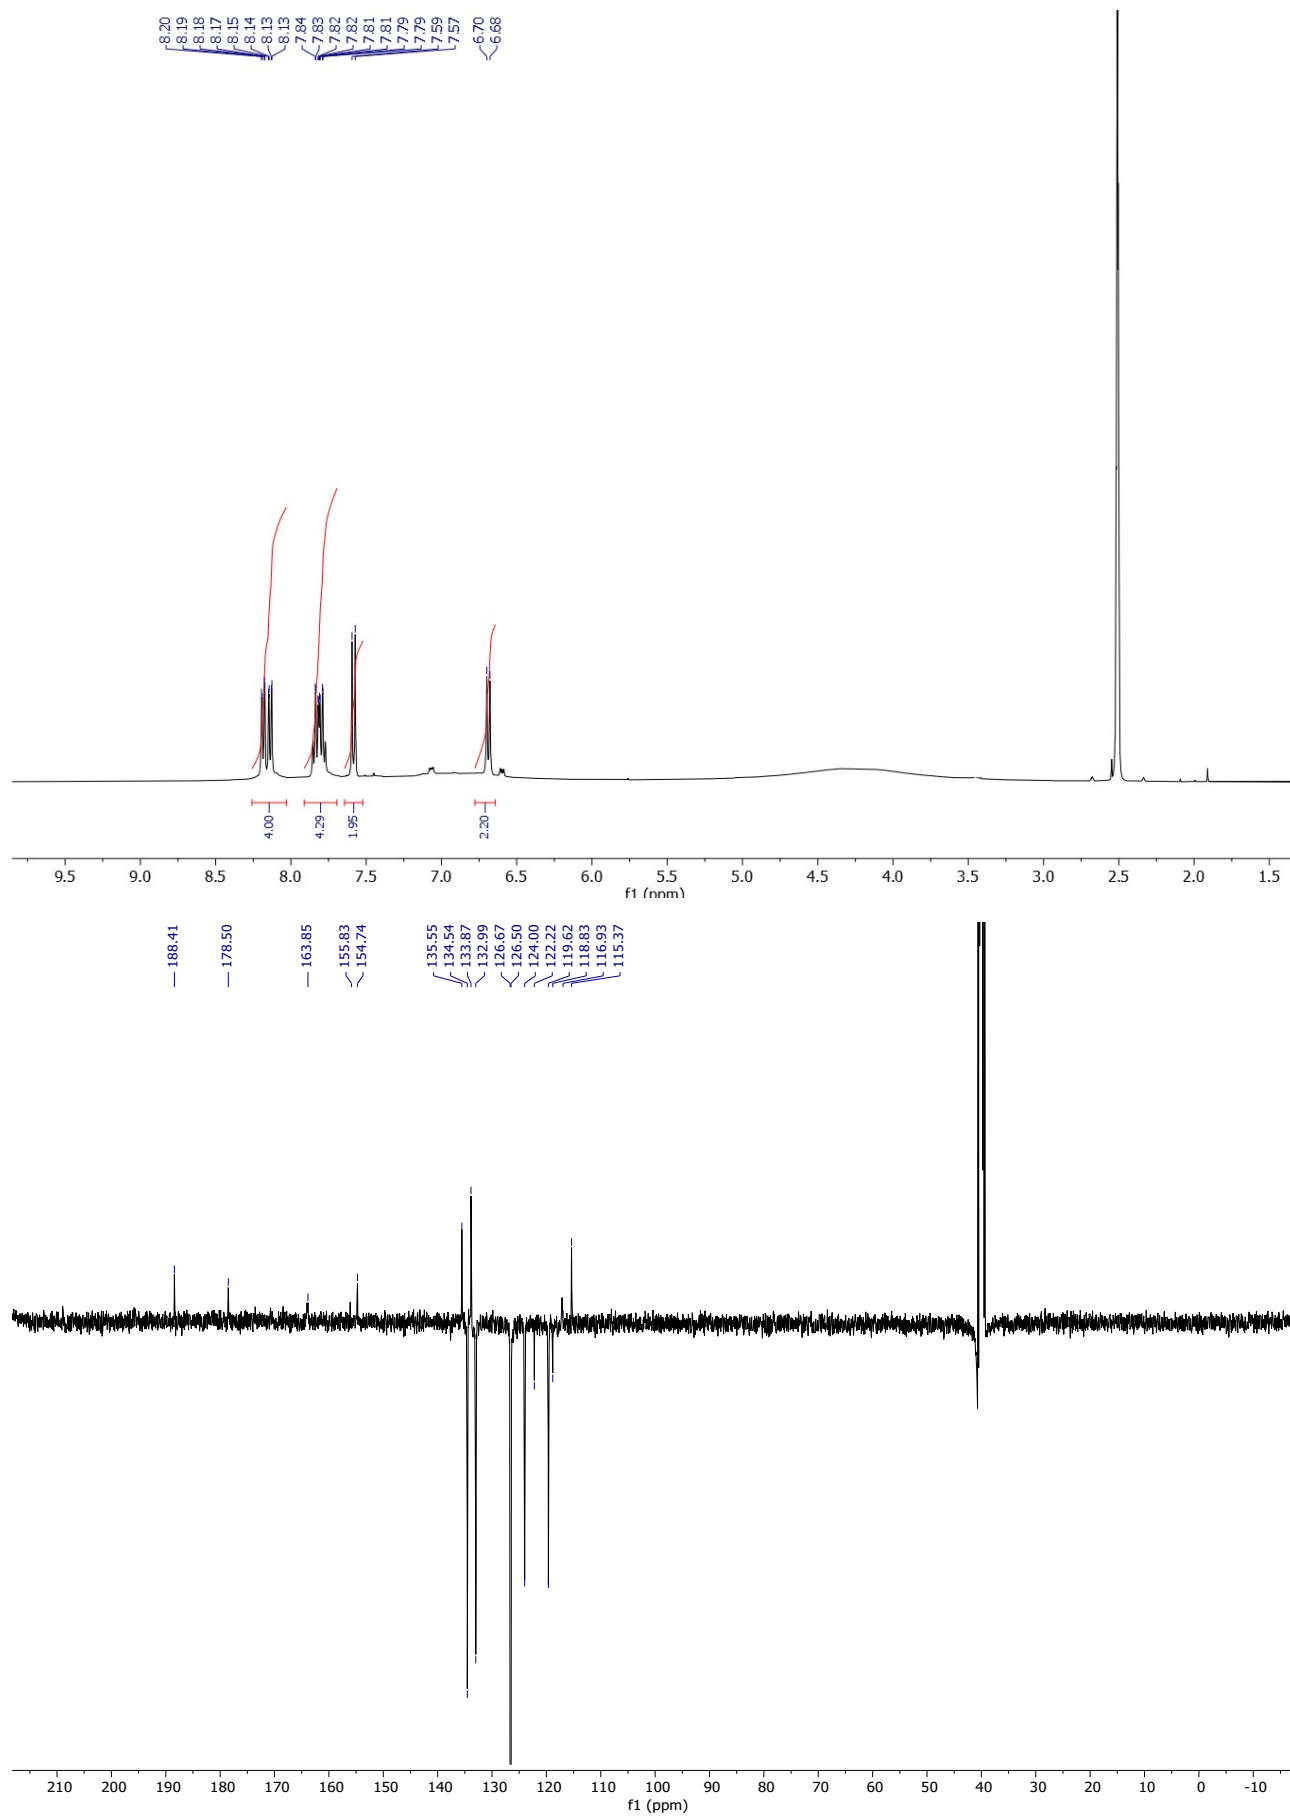

Figure S2. <sup>1</sup>H- and <sup>13</sup>C-NMR spectra of compound **2b**.

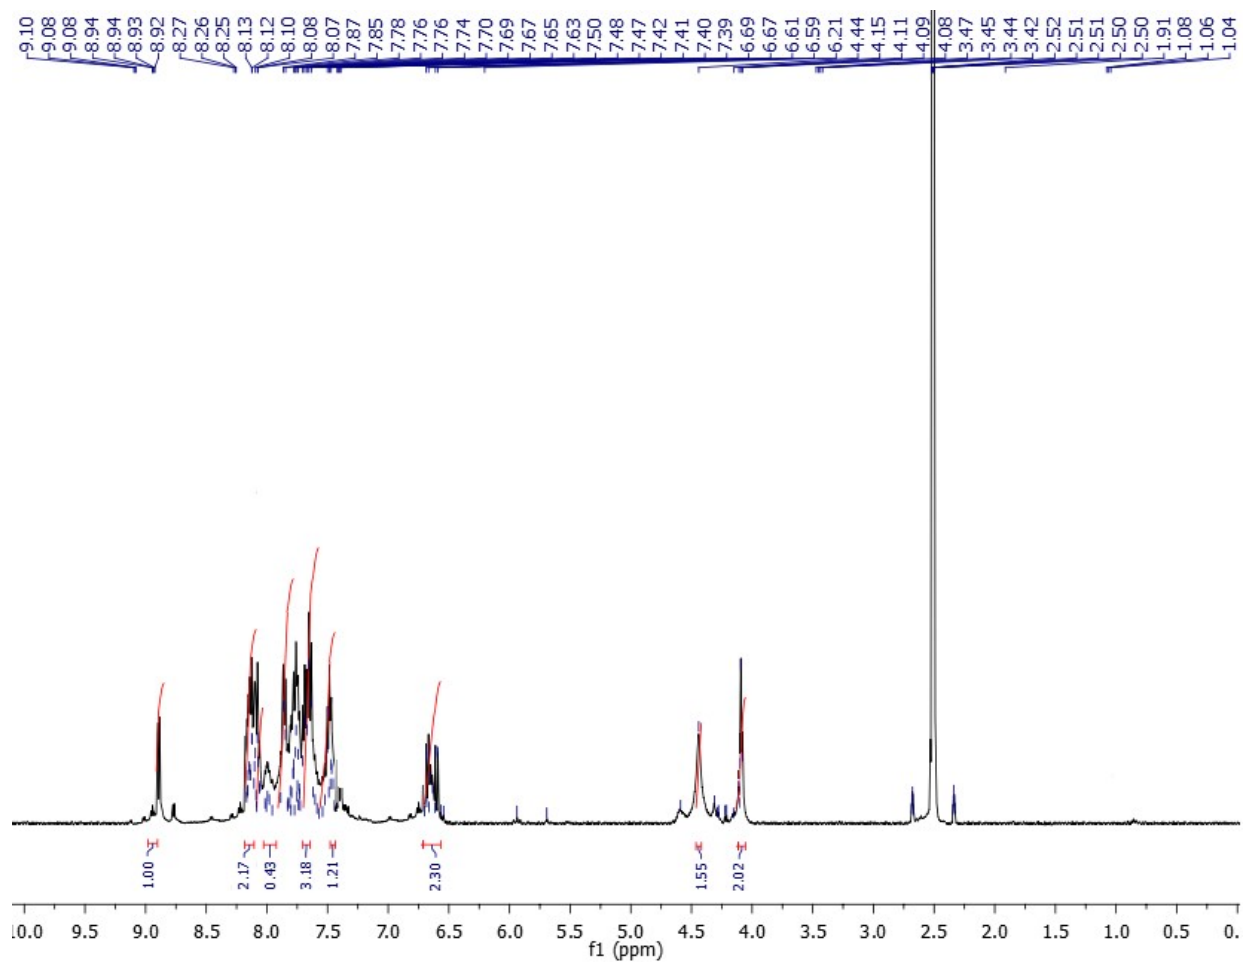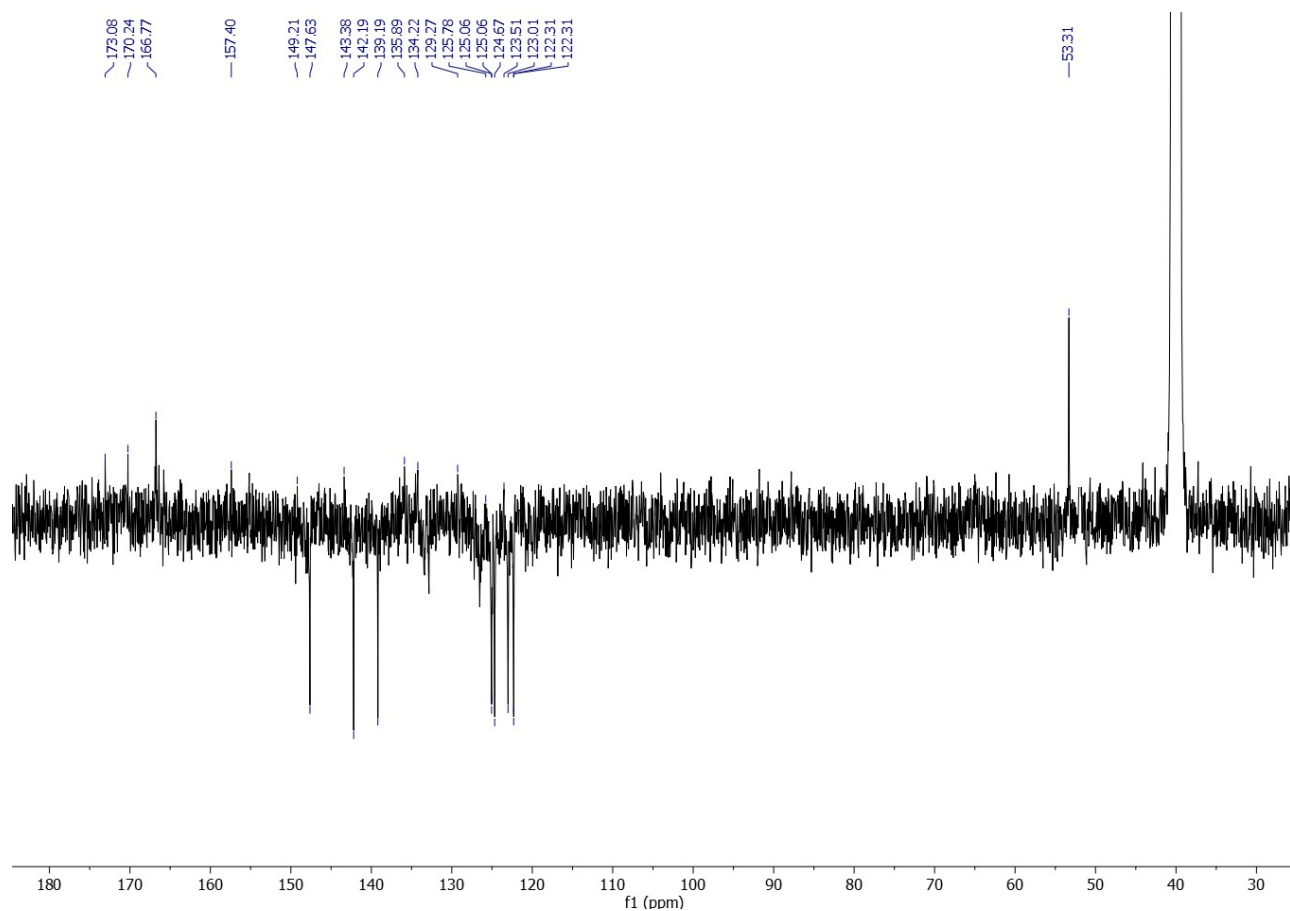

Figure S3.  $^1\text{H}$ - and  $^{13}\text{C}$ -NMR spectra of compound **3b**.

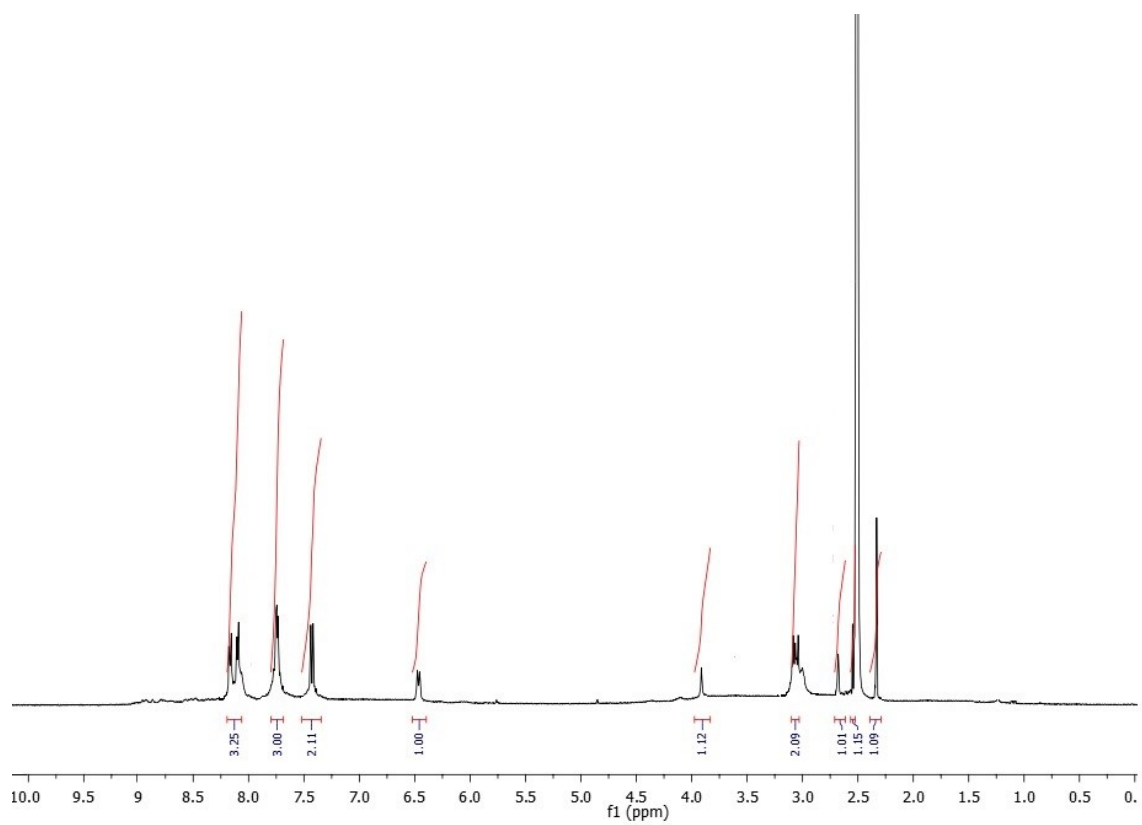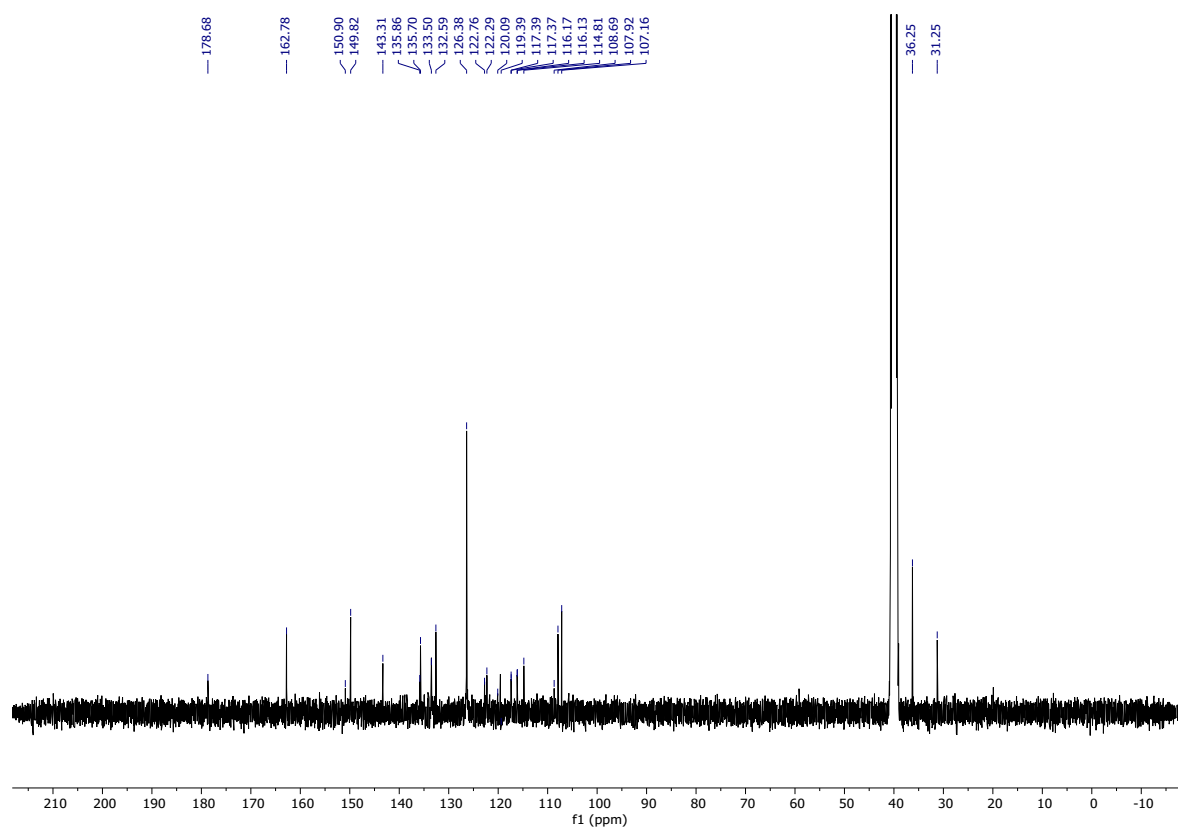

Figure S4. <sup>1</sup>H- and <sup>13</sup>C-NMR spectra of compound 4b.

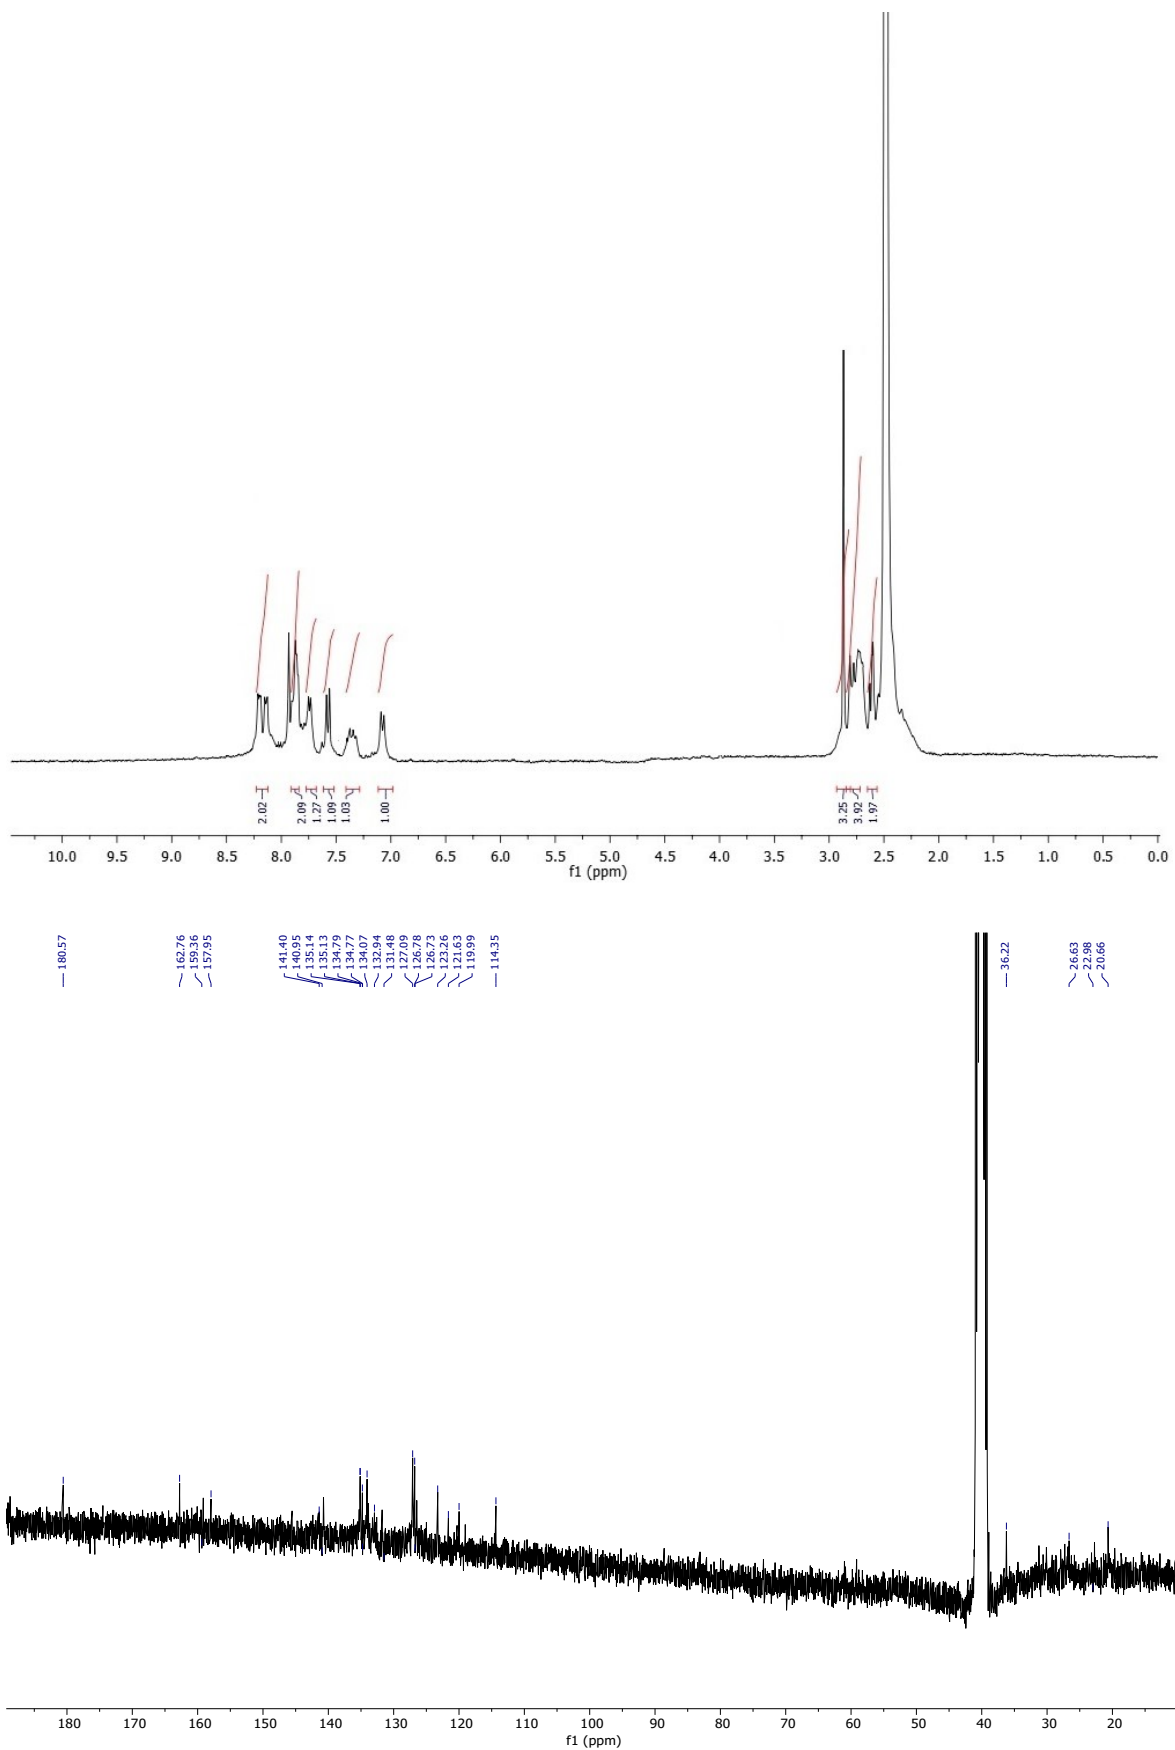

Figure S5.  $^1\text{H}$ - and  $^{13}\text{C}$ -NMR spectra of compound 5b.

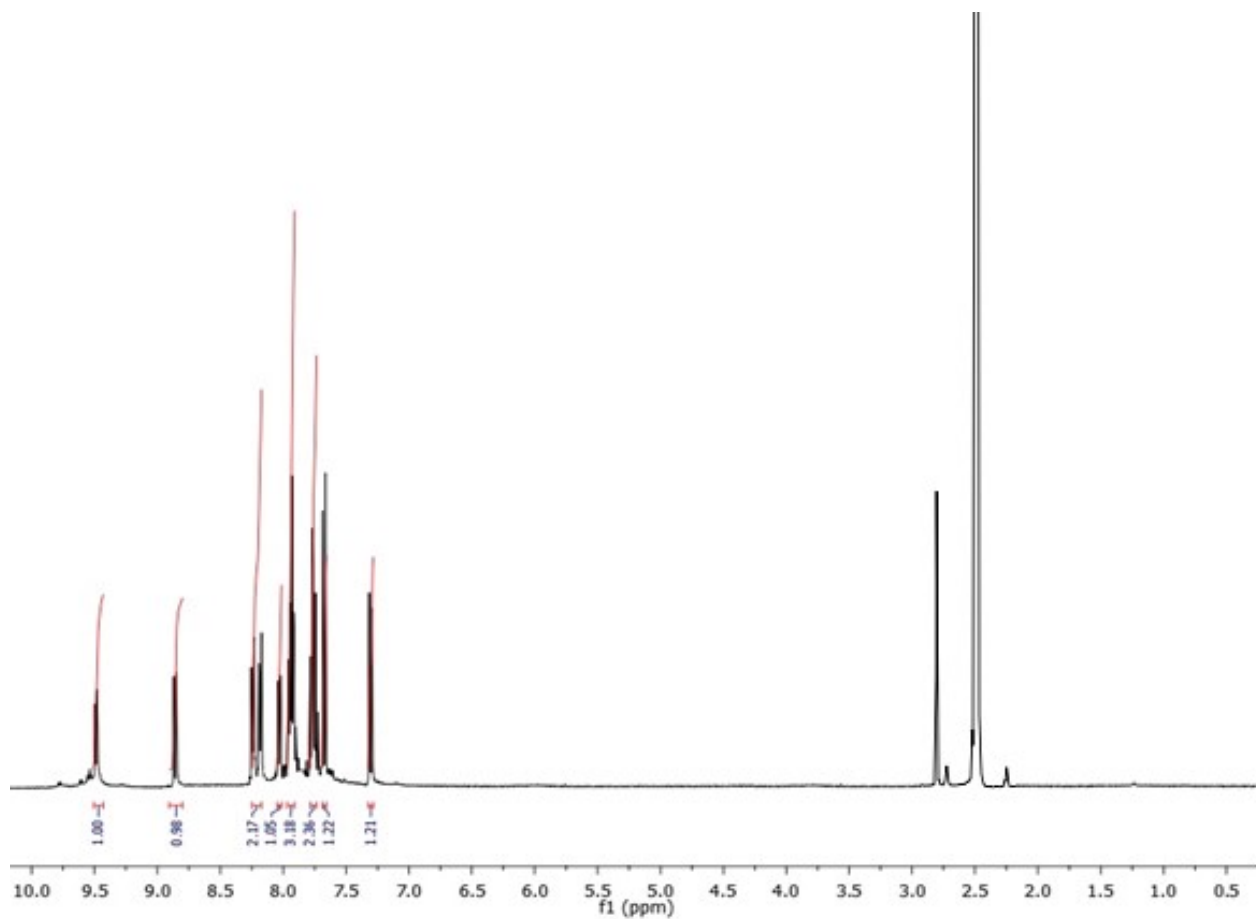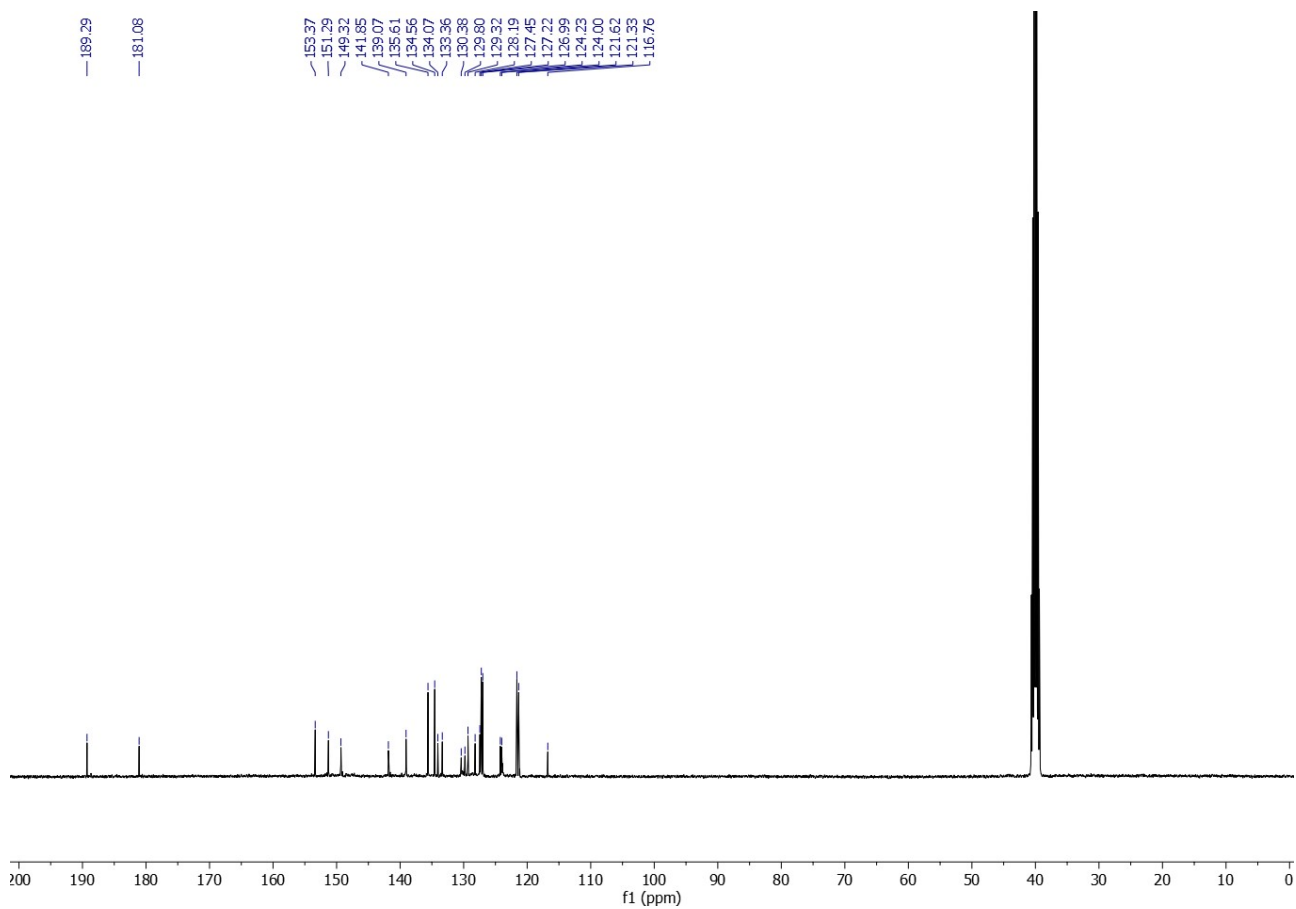

Figure S6.  $^1\text{H}$ - and  $^{13}\text{C}$ -NMR spectra of compound **6b**.



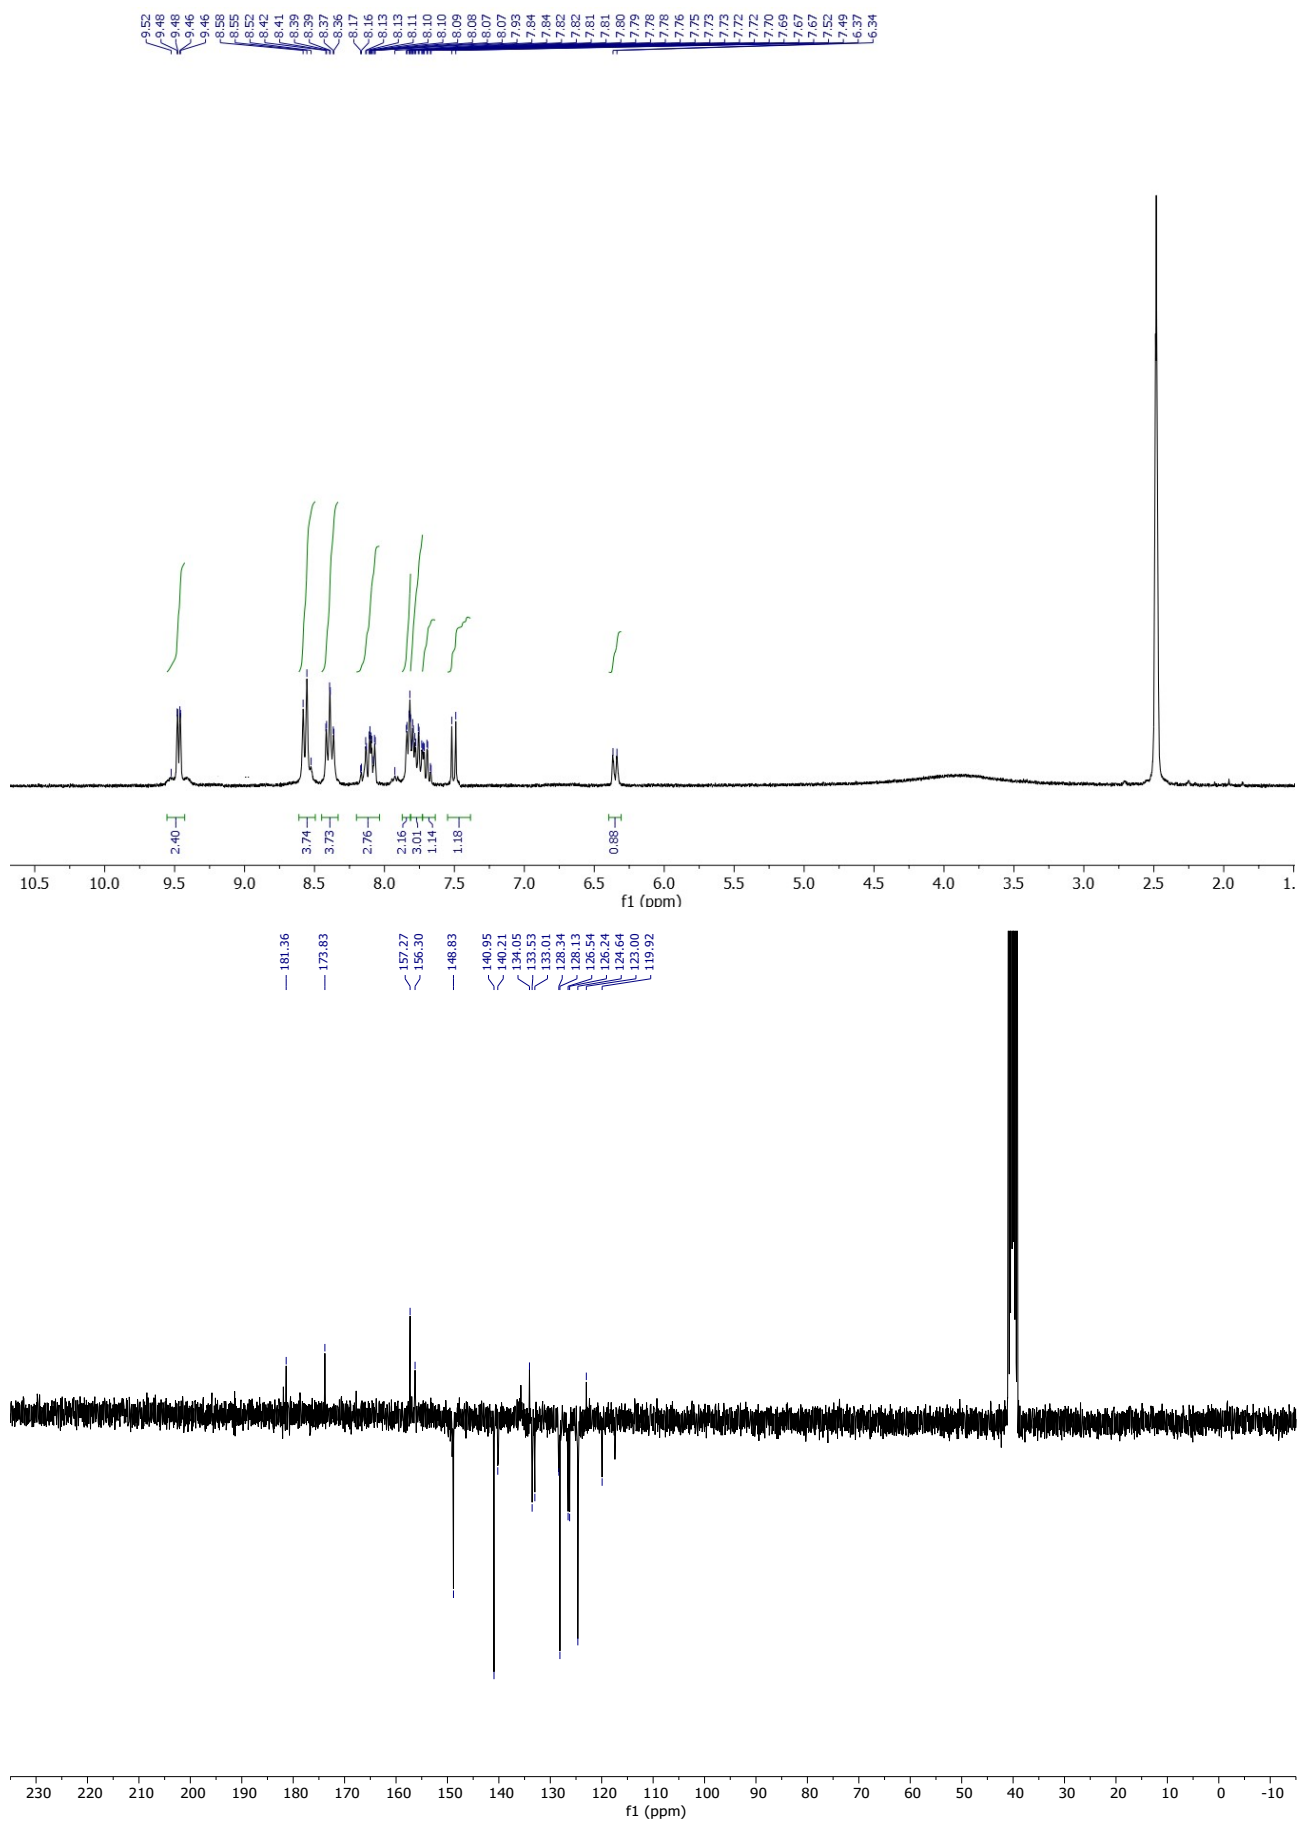

Figure S7. <sup>1</sup>H- and <sup>13</sup>C-NMR spectra of compound 7b.

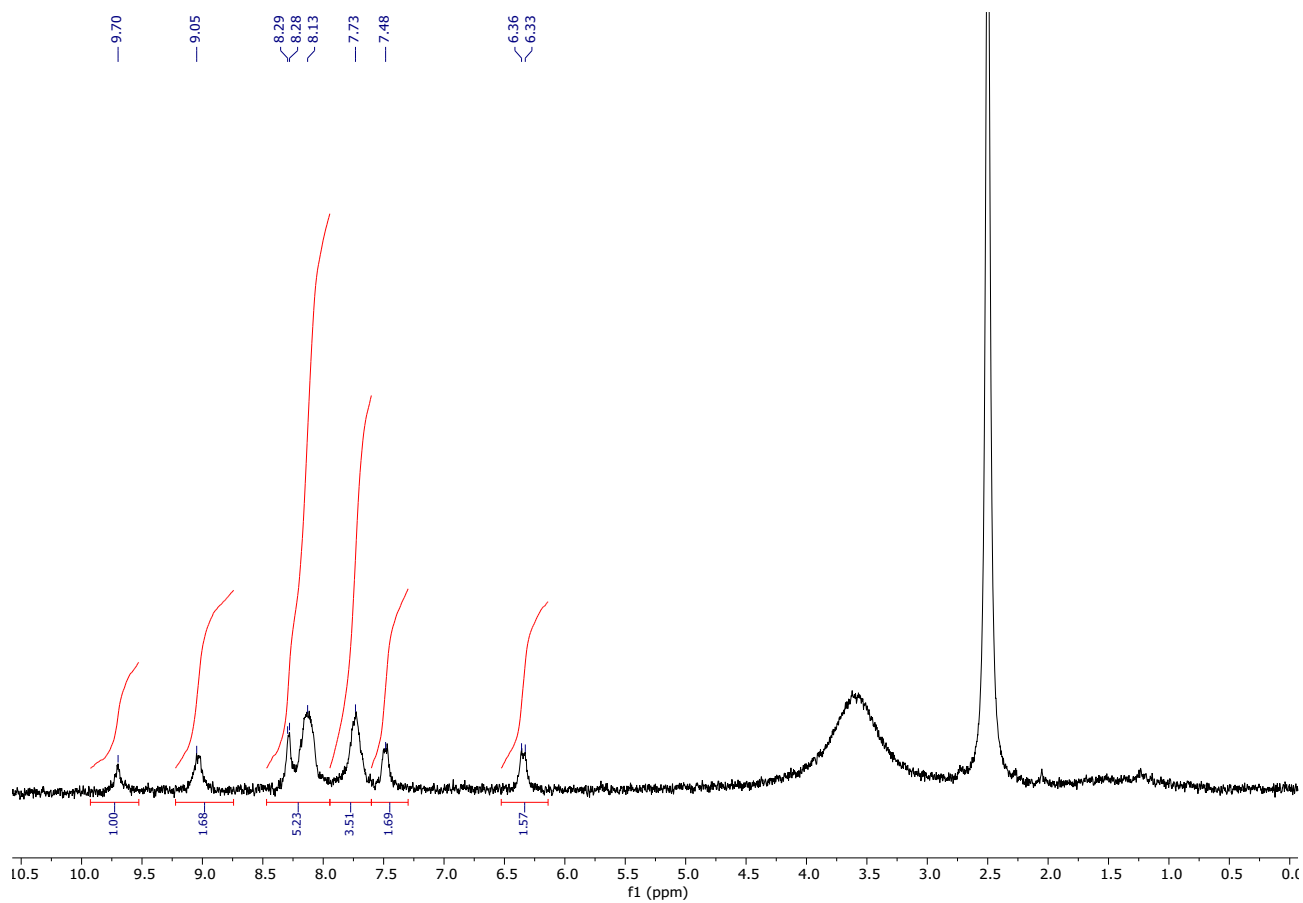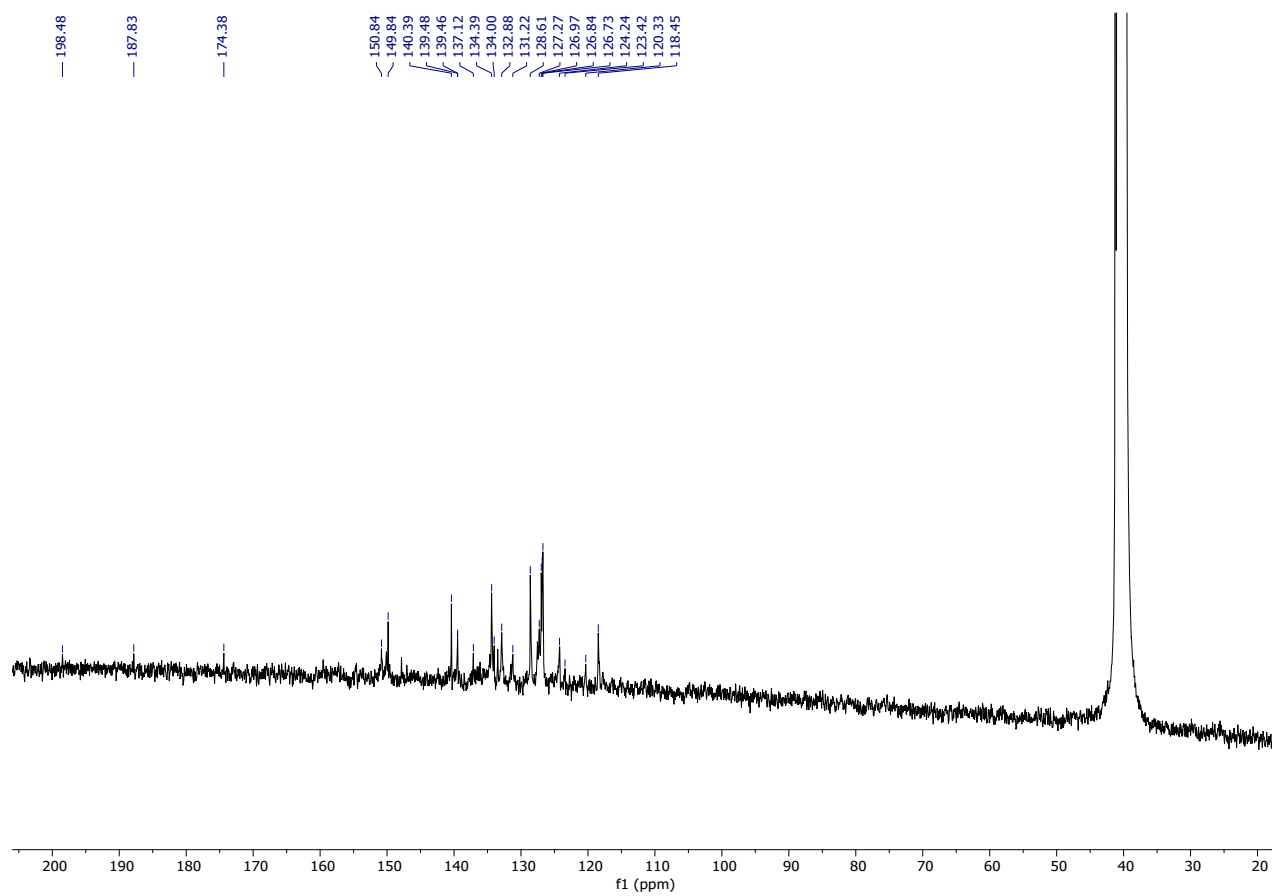

Figure S8.  $^1\text{H}$ - and  $^{13}\text{C}$ -NMR spectra of compound **8b**.

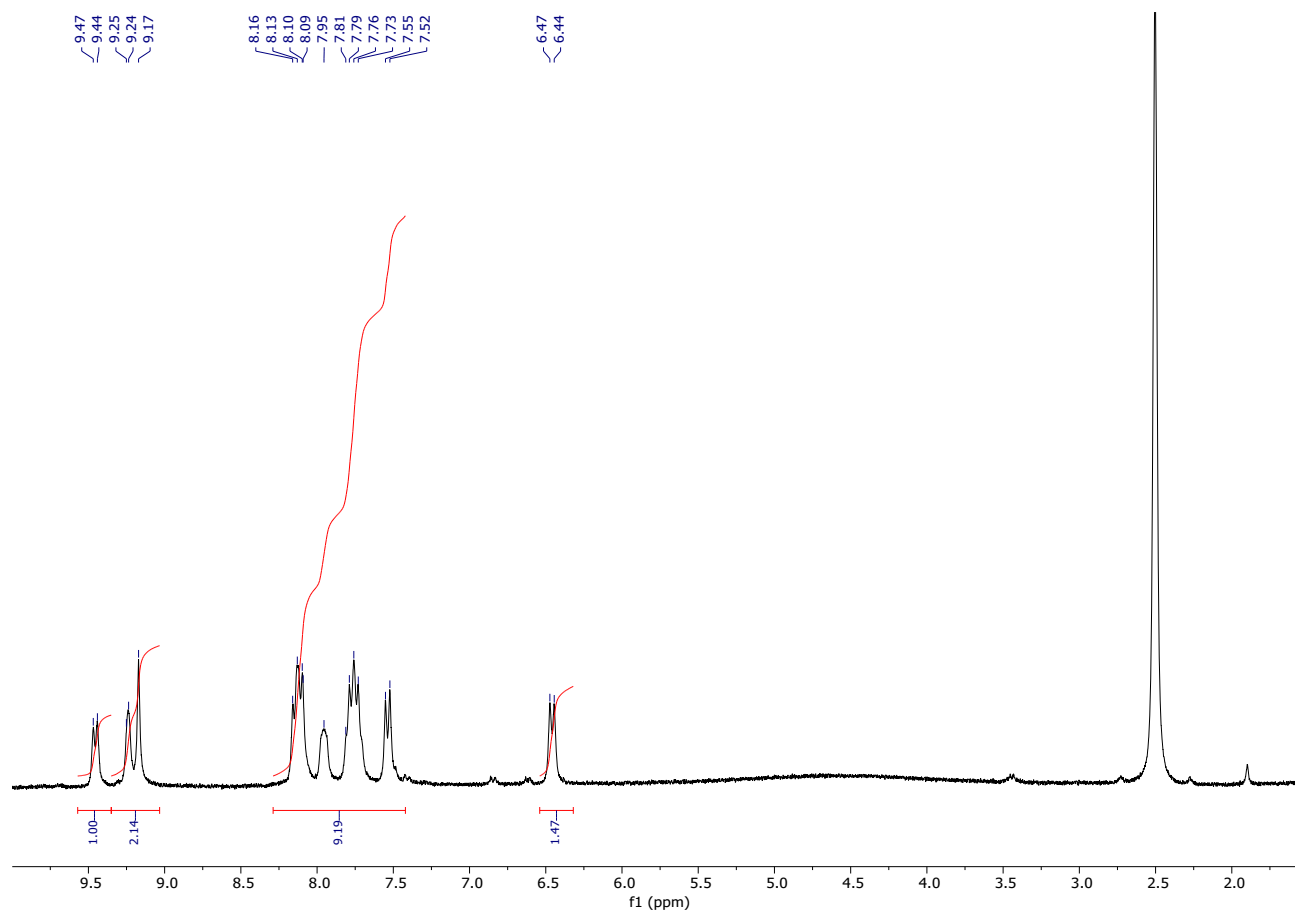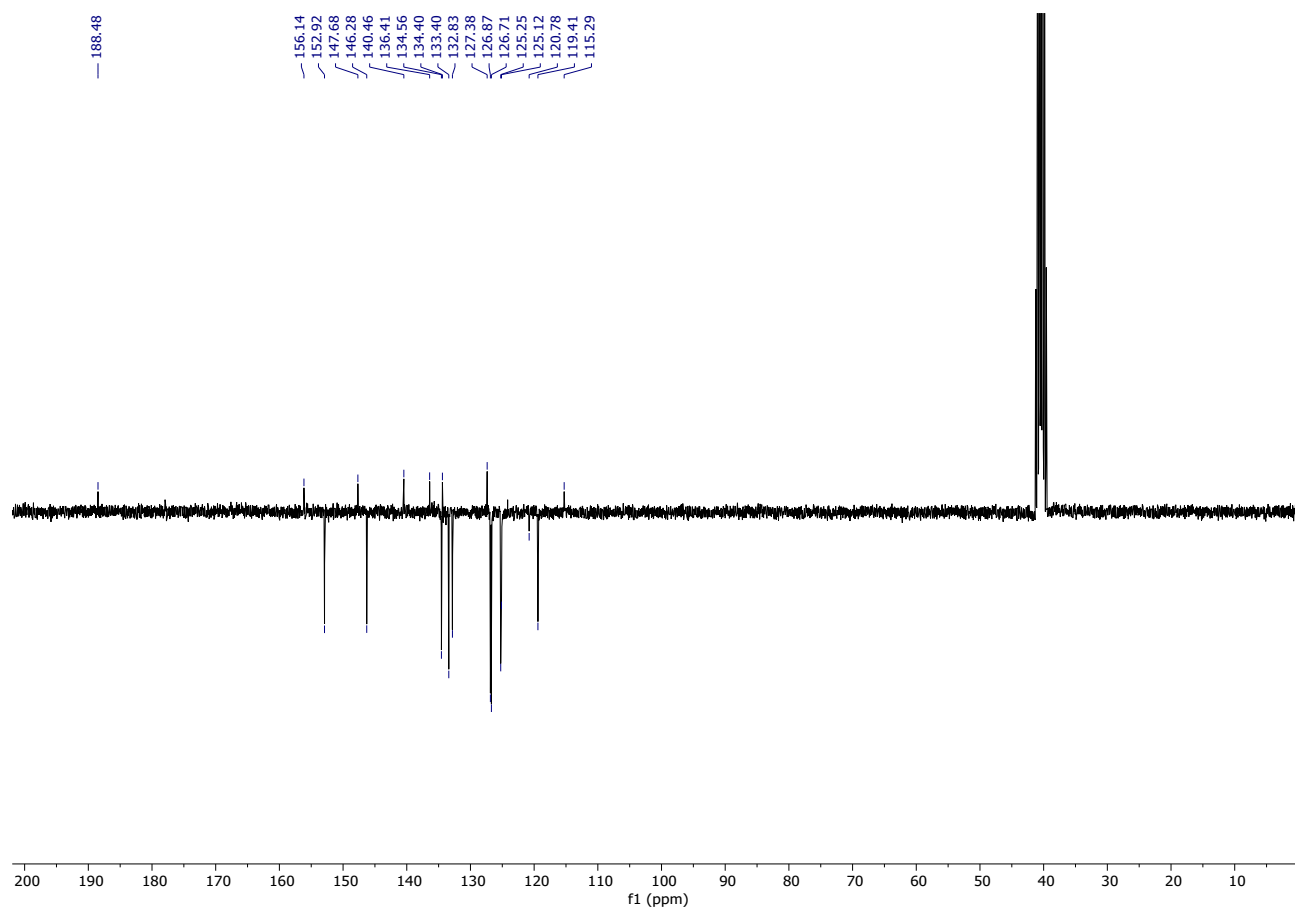

Figure S9.  $^1\text{H}$ - and  $^{13}\text{C}$ -NMR spectra of compound **9b**.

—2198.64

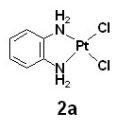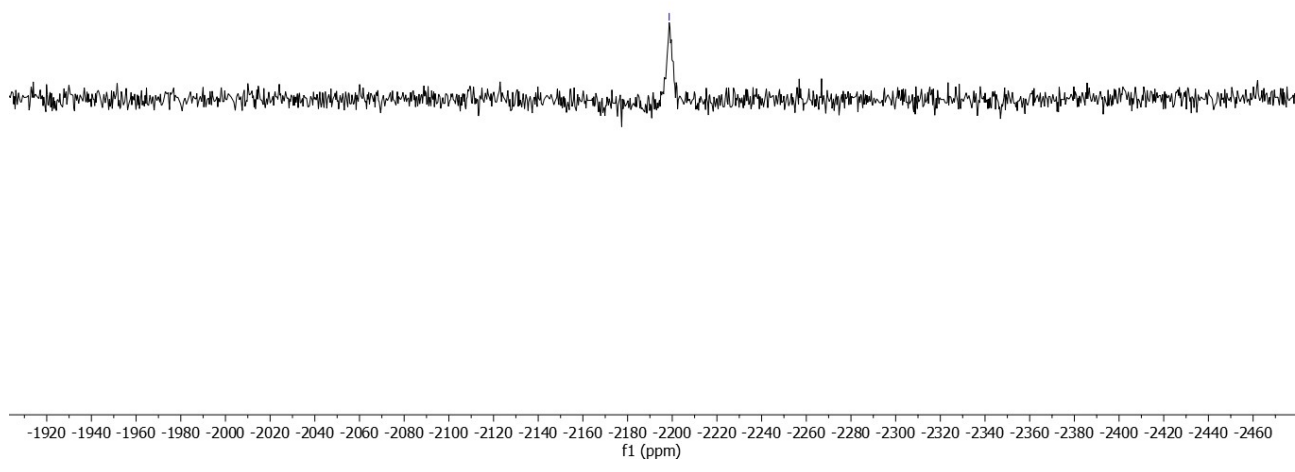

**Figure S10.**  $^{195}\text{Pt}$ -NMR dichloride precursor **2a**.

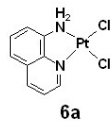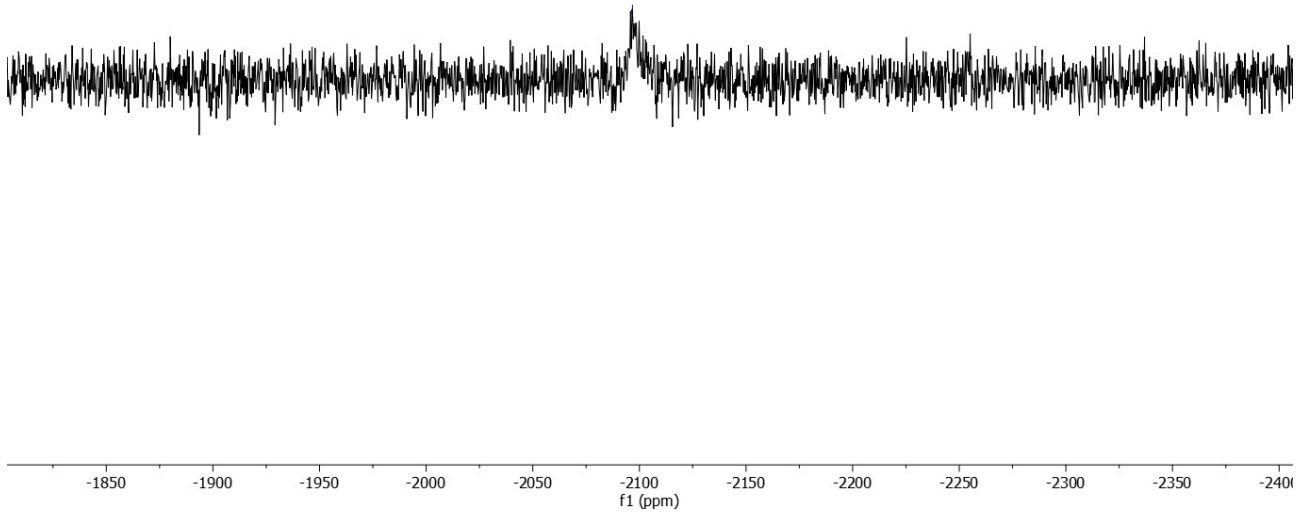

**Figure S11.**  $^{195}\text{Pt}$ -NMR dichloride precursor **6a**.

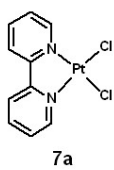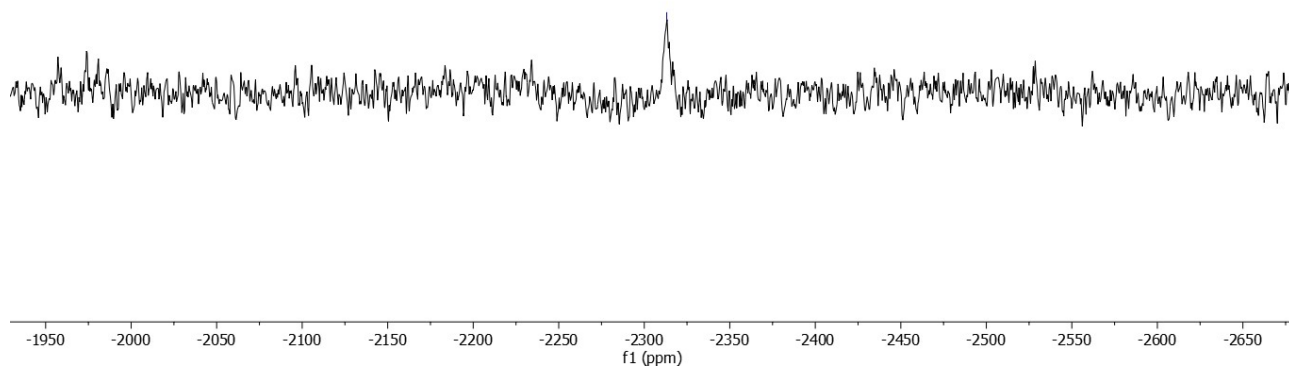

**Figure S12.**  $^{195}\text{Pt}$ -NMR dichloride precursor **7a**.

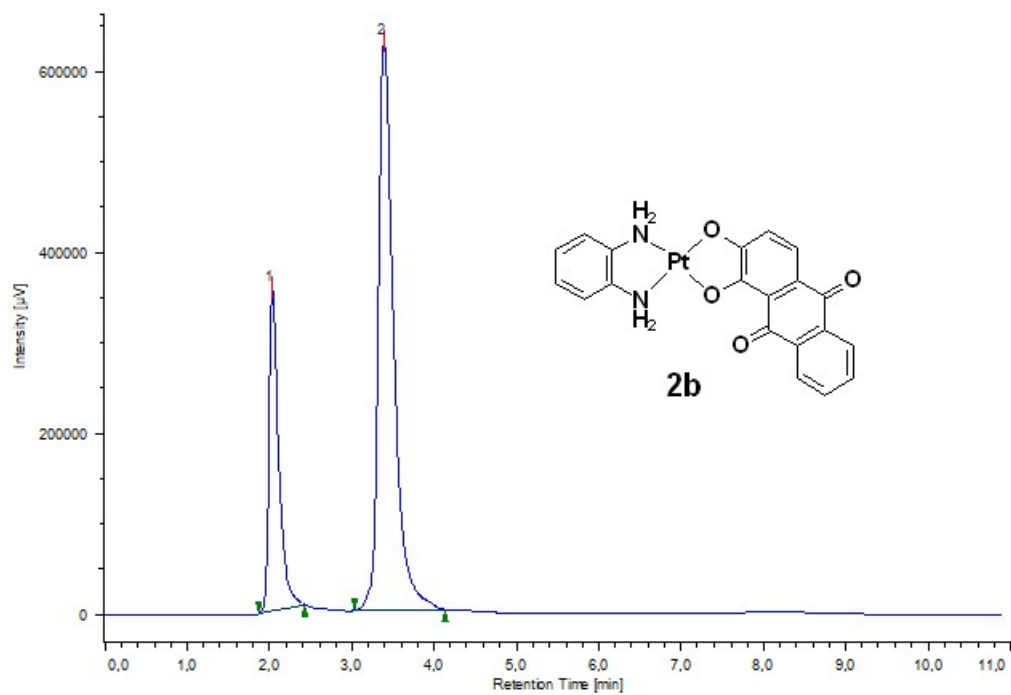

| tR    | Area    | Height | Area%  | Height% | Quantity | NTP  | Resolution | Symmetry Factor |
|-------|---------|--------|--------|---------|----------|------|------------|-----------------|
| 2,033 | 2984204 | 356658 | 26,422 | 36,249  | N/A      | 1546 | 5,097      | 1,678           |
| 3,383 | 8310157 | 627256 | 73,578 | 63,751  | N/A      | 1741 | N/A        | 1,564           |

**Figure S13.** HPLC of compound **2b** in presence of KI as internal standard (peak 1).

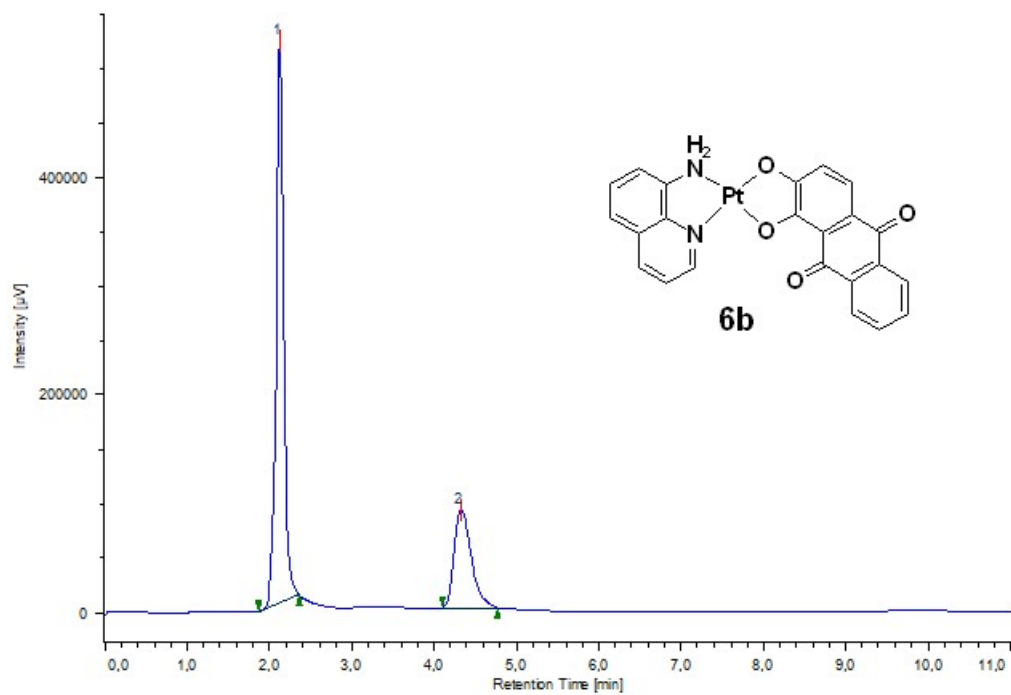

| tR    | Area    | Height | Area%  | Height% | Quantity | NTP  | Resolution | Symmetry Factor |
|-------|---------|--------|--------|---------|----------|------|------------|-----------------|
| 2,125 | 3246230 | 515045 | 71,234 | 85,207  | N/A      | 3315 | 8,313      | 1,021           |
| 4,325 | 1310879 | 89420  | 28,766 | 14,793  | N/A      | 2040 | N/A        | 1,363           |

**Figure S14.** HPLC of compound **6b** in presence of KI as internal standard (peak 1).



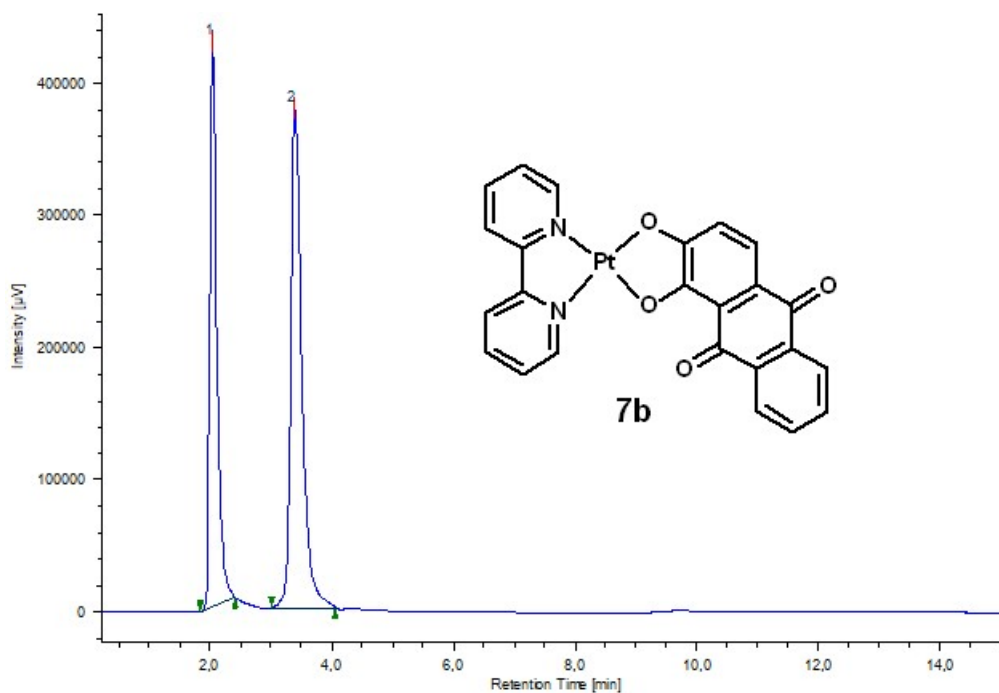

| tR    | Area    | Height | Area%  | Height% | Quantity | NTP  | Resolution | Symmetry Factor |
|-------|---------|--------|--------|---------|----------|------|------------|-----------------|
| 2,042 | 3459561 | 426282 | 41,796 | 53,098  | N/A      | 1694 | 5,282      | 1,524           |
| 3,392 | 4817710 | 376543 | 58,204 | 46,902  | N/A      | 1866 | N/A        | 1,522           |

**Figure S15.** HPLC of compound **7b** in presence of KI as internal standard (peak 1).

**Table TS1.**  $^1\text{H}$  and  $^{13}\text{C}$  chemical shift ( $\delta$ , ppm) computed in DMSO for the two possible isomers of complexes **3b-6b**.

| <i>cis</i> |              |                | <i>trans</i> |                |      |
|------------|--------------|----------------|--------------|----------------|------|
| <b>3b</b>  |              |                |              |                |      |
|            | <i>Label</i> | $\delta$ (ppm) | <i>Label</i> | $\delta$ (ppm) |      |
|            | $^1\text{H}$ | H17            | 9.40         | H17            | 9.79 |
|            |              | H37            | 9.09         | H37            | 9.14 |
|            |              | H39            | 9.00         | H39            | 9.01 |
|            |              | H27            | 8.64         | H27            | 8.66 |
|            |              | H31            | 8.47         | H40            | 8.48 |
|            |              | H40            | 8.46         | H31            | 8.46 |
|            |              | H41            | 8.44         | H41            | 8.44 |
|            |              | H21            | 8.24         | H21            | 8.25 |
|            |              | H22            | 8.22         | H22            | 8.33 |
|            |              | H26            | 7.49         | H26            | 7.49 |
|            | H11          | 5.05           | H11          | 5.03           |      |

|                 |     |        |     |        |
|-----------------|-----|--------|-----|--------|
|                 | H12 | 4.97   | H12 | 4.95   |
|                 | H6  | 4.36   | H6  | 4.23   |
|                 | H8  | 4.29   | H8  | 4.09   |
| <sup>13</sup> C | C23 | 204.78 | C23 | 204.97 |
|                 | C30 | 202.01 | C30 | 202.41 |
|                 | C14 | 192.84 | C14 | 193.18 |
|                 | C13 | 187.16 | C13 | 184.93 |
|                 | C9  | 179.27 | C9  | 179.25 |
|                 | C10 | 168.85 | C10 | 168.73 |
|                 | C20 | 157.96 | C20 | 157.61 |
|                 | C28 | 152.79 | C28 | 152.80 |
|                 | C36 | 151.50 | C36 | 151.72 |
|                 | C32 | 151.40 | C32 | 151.36 |
|                 | C38 | 151.00 | C38 | 151.11 |
|                 | C33 | 144.94 | C33 | 145.05 |
|                 | C35 | 144.42 | C35 | 144.50 |
|                 | C16 | 143.58 | C16 | 143.53 |
|                 | C15 | 141.08 | C15 | 140.94 |
|                 | C24 | 140.18 | C24 | 140.50 |
|                 | C25 | 139.39 | C25 | 139.24 |
|                 | C18 | 136.87 | C18 | 136.40 |
|                 | C19 | 133.46 | C19 | 134.70 |
|                 | C7  | 66.52  | C7  | 66.15  |

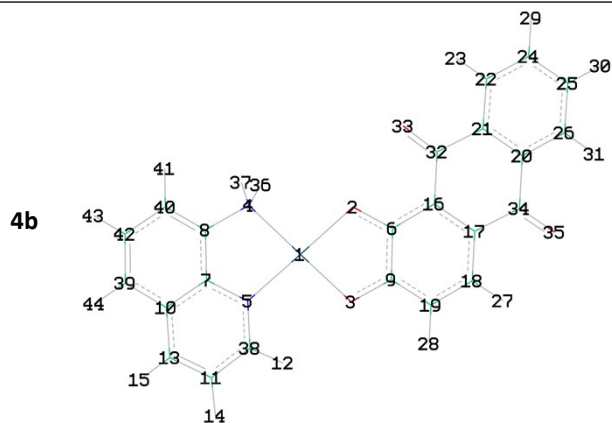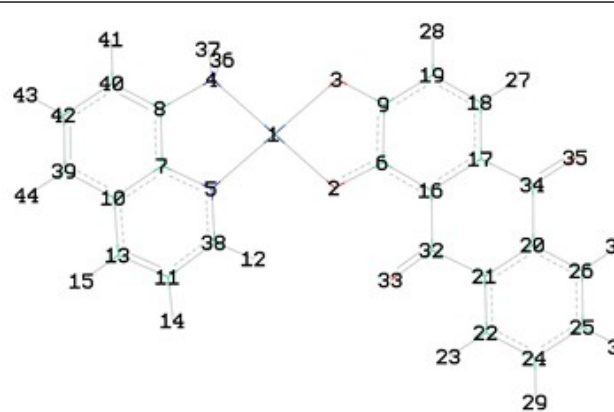

|                 | <i>Label</i> | $\delta$ (ppm) | <i>Label</i> | $\delta$ (ppm) |
|-----------------|--------------|----------------|--------------|----------------|
| <sup>1</sup> H  | H12          | 10.29          | H12          | 10.00          |
|                 | H15          | 9.21           | H15          | 9.19           |
|                 | H23          | 9.21           | H23          | 9.16           |
|                 | H31          | 9.05           | H31          | 9.04           |
|                 | H44          | 8.91           | H44          | 8.91           |
|                 | H41          | 8.84           | H41          | 8.87           |
|                 | H43          | 8.65           | H43          | 8.66           |
|                 | H14          | 8.57           | H29          | 8.52           |
|                 | H29          | 8.54           | H14          | 8.49           |
|                 | H30          | 8.49           | H30          | 8.48           |
|                 | H27          | 8.41           | H27          | 8.44           |
|                 | H28          | 7.55           | H28          | 7.60           |
|                 | H36          | 6.29           | H37          | 6.40           |
|                 | H37          | 6.27           | H36          | 6.38           |
| <sup>13</sup> C | C32          | 184.99         | C32          | 185.93         |
|                 | C34          | 182.61         | C34          | 183.88         |
|                 | C9           | 170.65         | C9           | 170.38         |
|                 | C6           | 164.97         | C6           | 166.45         |
|                 | C38          | 148.68         | C38          | 148.39         |
|                 | C7           | 143.43         | C7           | 143.36         |
|                 | C13          | 138.89         | C13          | 138.90         |
|                 | C21          | 133.97         | C21          | 133.77         |
|                 | C8           | 133.53         | C8           | 133.58         |

|     |        |     |        |
|-----|--------|-----|--------|
| C20 | 132.72 | C20 | 132.62 |
| C24 | 131.63 | C24 | 131.66 |
| C25 | 131.12 | C25 | 131.19 |
| C39 | 129.58 | C39 | 129.59 |
| C10 | 129.02 | C10 | 128.94 |
| C40 | 128.59 | C40 | 128.47 |
| C42 | 128.08 | C42 | 128.17 |
| C22 | 126.49 | C22 | 126.51 |
| C26 | 126.10 | C26 | 126.27 |
| C17 | 123.35 | C17 | 122.85 |
| C11 | 123.07 | C11 | 122.91 |
| C18 | 122.63 | C18 | 123.21 |
| C16 | 120.90 | C16 | 120.86 |
| C19 | 117.61 | C19 | 117.10 |

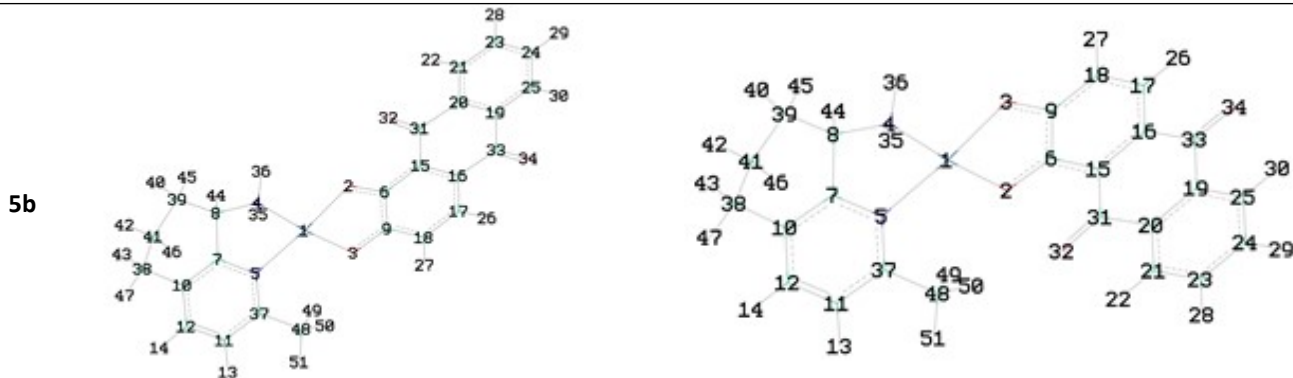

|                 | <i>Label</i> | $\delta$ (ppm) | <i>Label</i> | $\delta$ (ppm) |
|-----------------|--------------|----------------|--------------|----------------|
| <sup>1</sup> H  | H22          | 9.02           | H22          | 9.11           |
|                 | H30          | 8.94           | H30          | 9.00           |
|                 | H26          | 8.42           | H28          | 8.46           |
|                 | H28          | 8.41           | H26          | 8.46           |
|                 | H29          | 8.38           | H29          | 8.43           |
|                 | H14          | 8.30           | H14          | 8.37           |
|                 | H13          | 8.01           | H13          | 8.15           |
|                 | H27          | 7.39           | H27          | 7.50           |
|                 | H44          | 5.03           | H44          | 5.13           |
|                 | H36          | 4.11           | H49          | 4.24           |
|                 | H35          | 3.76           | H36          | 3.99           |
|                 | H49          | 3.74           | H50          | 3.75           |
|                 | H50          | 3.50           | H35          | 3.72           |
|                 | H47          | 3.29           | H47          | 3.35           |
|                 | H43          | 3.16           | H43          | 3.23           |
|                 | H51          | 2.95           | H51          | 3.17           |
|                 | H40          | 2.92           | H40          | 3.00           |
|                 | H45          | 2.62           | H45          | 2.60           |
| H42             | 2.38         | H42            | 2.42         |                |
| H46             | 1.86         | H46            | 1.91         |                |
| <sup>13</sup> C | C31          | 202.11         | C31          | 204.40         |
|                 | C33          | 200.08         | C33          | 202.44         |
|                 | C9           | 192.78         | C9           | 192.32         |
|                 | C6           | 184.61         | C6           | 185.82         |
|                 | C37          | 181.60         | C37          | 182.60         |
|                 | C7           | 175.60         | C7           | 176.42         |
|                 | C12          | 156.77         | C12          | 157.10         |
|                 | C10          | 154.56         | C10          | 155.33         |
|                 | C20          | 153.25         | C20          | 152.90         |
|                 | C19          | 151.86         | C23          | 151.62         |
|                 | C23          | 150.70         | C19          | 151.25         |
|                 | C24          | 150.32         | C24          | 150.91         |
| C21             | 144.10       | C21            | 145.04       |                |

|     |        |     |        |
|-----|--------|-----|--------|
| C25 | 143.69 | C25 | 144.36 |
| C11 | 143.25 | C11 | 144.30 |
| C17 | 139.06 | C16 | 140.62 |
| C16 | 139.05 | C17 | 138.81 |
| C15 | 135.89 | C15 | 136.22 |
| C18 | 132.68 | C18 | 133.86 |
| C8  | 70.94  | C8  | 70.81  |
| C39 | 47.13  | C39 | 47.59  |
| C38 | 45.13  | C38 | 45.52  |
| C48 | 39.50  | C48 | 40.08  |
| C41 | 34.96  | C41 | 35.19  |

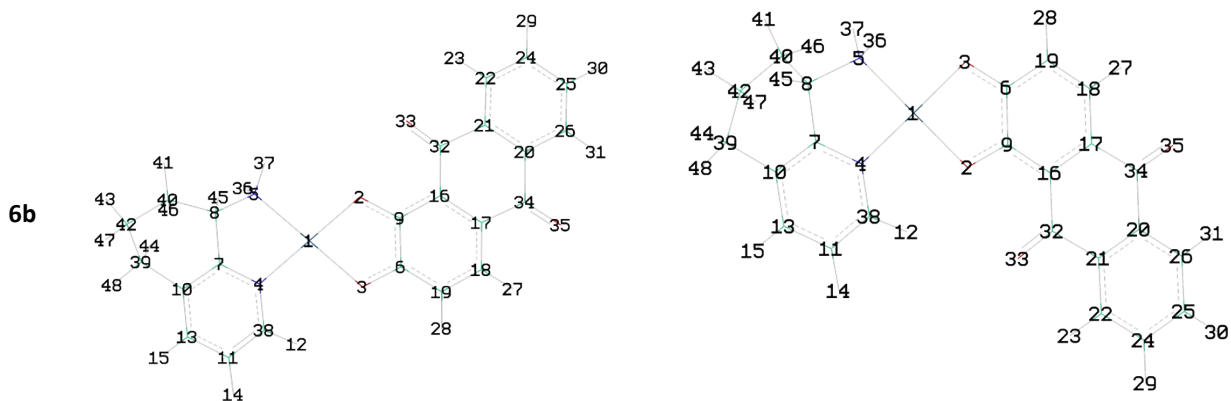

|                 | <i>Label</i> | $\delta$ (ppm) | <i>Label</i> | $\delta$ (ppm) |
|-----------------|--------------|----------------|--------------|----------------|
| <sup>1</sup> H  | H12          | 9.23           | H12          | 9.62           |
|                 | H23          | 9.02           | H23          | 9.13           |
|                 | H31          | 8.94           | H31          | 9.01           |
|                 | H15          | 8.41           | H15          | 8.48           |
|                 | H29          | 8.41           | H29          | 8.48           |
|                 | H27          | 8.40           | H27          | 8.45           |
|                 | H30          | 8.38           | H30          | 8.44           |
|                 | H14          | 8.10           | H14          | 8.26           |
|                 | H28          | 7.43           | H28          | 7.47           |
|                 | H45          | 4.77           | H45          | 4.80           |
|                 | H37          | 4.52           | H37          | 4.59           |
|                 | H36          | 3.76           | H36          | 3.75           |
|                 | H48          | 3.35           | H48          | 3.39           |
|                 | H44          | 3.09           | H41          | 3.26           |
|                 | H41          | 3.04           | H44          | 3.13           |
|                 | H43          | 2.60           | H43          | 2.65           |
| H47             | 2.29         | H47            | 2.19         |                |
| H46             | 2.01         | H46            | 2.12         |                |
| <sup>13</sup> C | C32          | 202.06         | C32          | 204.92         |
|                 | C34          | 200.29         | C34          | 202.33         |
|                 | C6           | 191.95         | C6           | 193.25         |
|                 | C9           | 186.07         | C9           | 185.13         |
|                 | C7           | 179.53         | C7           | 179.34         |
|                 | C38          | 164.04         | C38          | 165.35         |
|                 | C10          | 156.56         | C10          | 158.26         |
|                 | C13          | 155.24         | C13          | 155.40         |
|                 | C21          | 153.31         | C21          | 152.86         |
|                 | C20          | 151.71         | C24          | 151.69         |
|                 | C24          | 150.78         | C20          | 151.41         |
|                 | C25          | 150.26         | C25          | 151.07         |
|                 | C22          | 144.13         | C22          | 145.03         |
|                 | C26          | 143.70         | C26          | 144.50         |
|                 | C11          | 142.69         | C11          | 143.35         |
|                 | C17          | 139.65         | C17          | 140.45         |
| C18             | 138.65       | C18            | 139.23       |                |

|     |        |     |        |
|-----|--------|-----|--------|
| C16 | 136.19 | C16 | 136.40 |
| C19 | 132.70 | C19 | 134.60 |
| C8  | 73.40  | C8  | 72.23  |
| C40 | 44.13  | C40 | 45.12  |
| C39 | 42.26  | C39 | 43.73  |
| C42 | 32.55  | C42 | 34.07  |

**Table TS2.** The shortest H-H distance (Å) between N<sup>N</sup> and aliz ligands computed in DMSO for the depicted isomers *cis* and *trans* of complexes **3b-6b**, where H3 can be phenyl H (**3b**, **4b** and **6b**) or methyl H (**5b**).

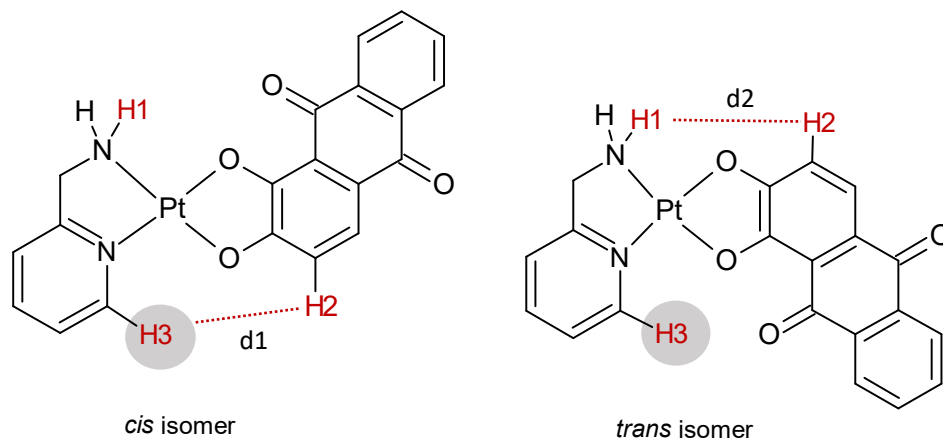

|           | <b>3b</b>  |              | <b>4b</b>  |              | <b>5b</b>  |              | <b>6b</b>  |              |
|-----------|------------|--------------|------------|--------------|------------|--------------|------------|--------------|
|           | <i>cis</i> | <i>trans</i> | <i>cis</i> | <i>trans</i> | <i>cis</i> | <i>trans</i> | <i>cis</i> | <i>trans</i> |
| <b>d1</b> | 4.613      |              | 4.322      |              | 3.849      |              | 4.373      |              |
| <b>d2</b> |            | 5.304        |            | 5.335        |            | 5.051        |            | 5.497        |

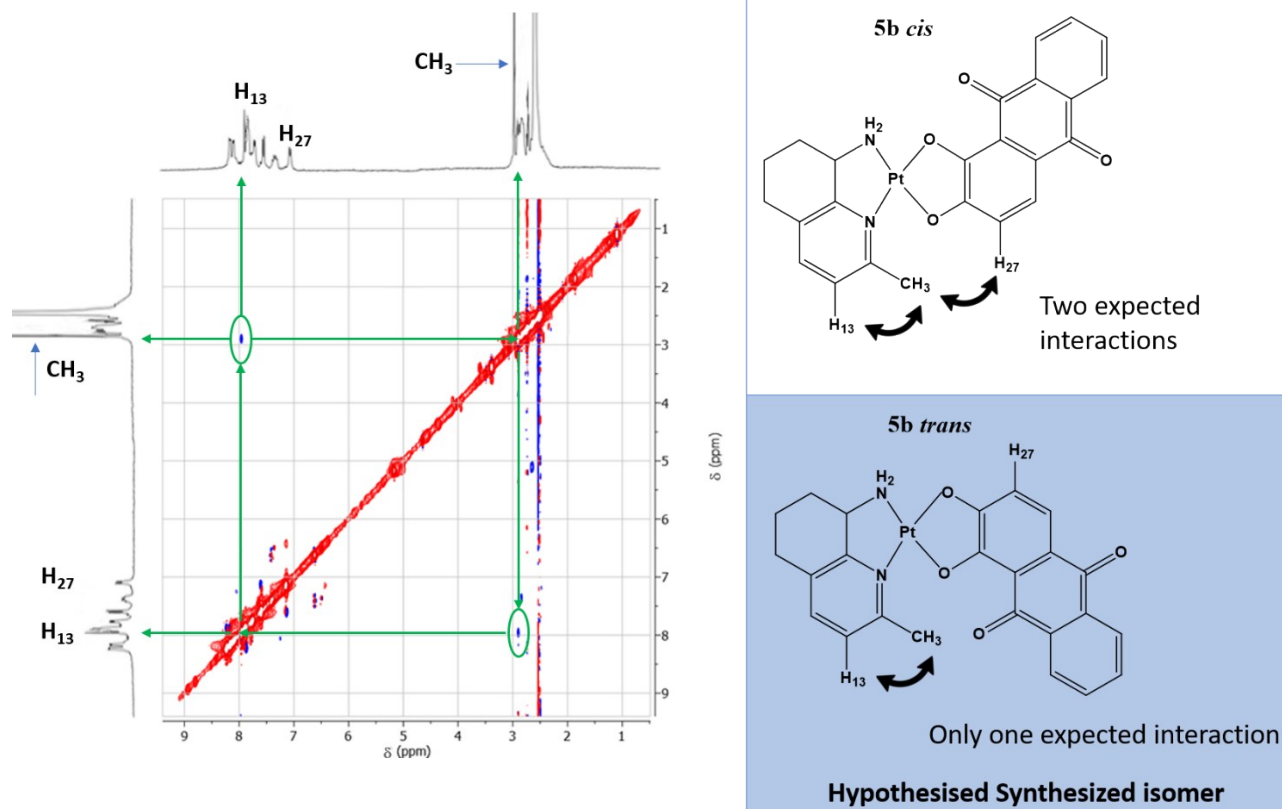

**Figure S16.** NOESY bidimensional experiment of complex **5b**. Note that proton numbers ( $H_{13}$  and  $H_{27}$ ) are relative to the numbering used in Table S1.

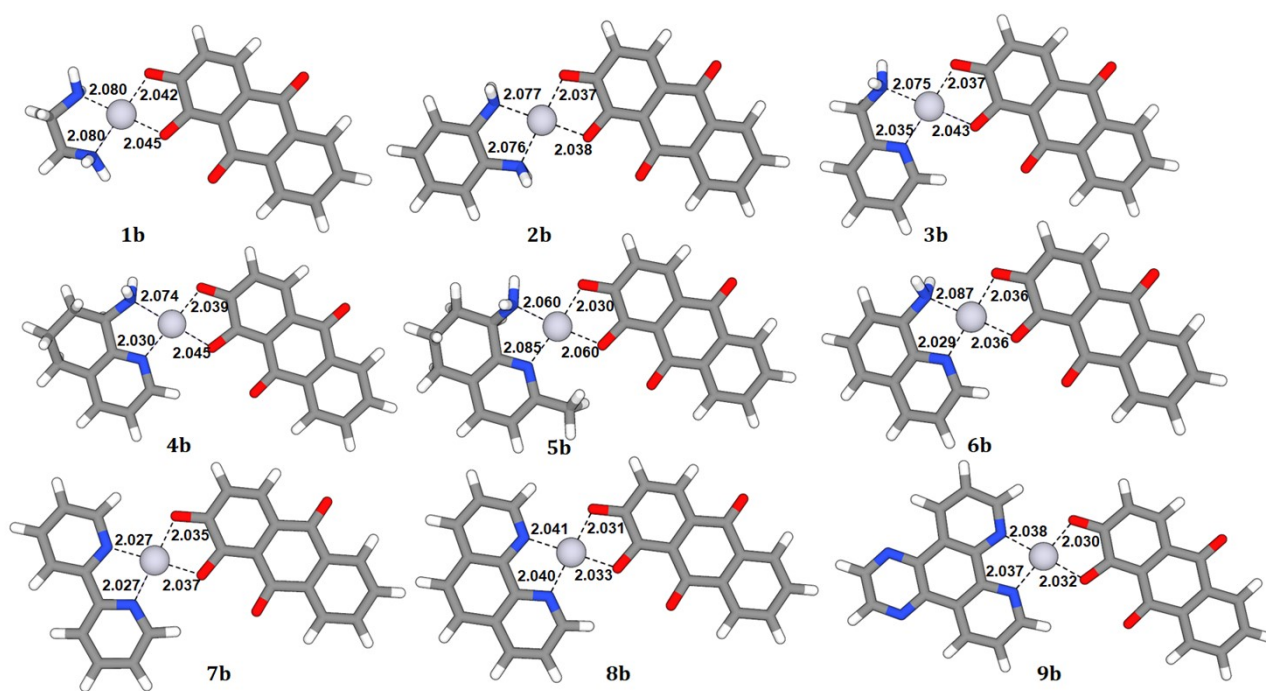

**Figure S17.** Optimized structure of complexes **1b-9b**. Bond distances in Å are reported.

**Table TS3.** Cartesian Coordinates of the optimized structures for the complexes.

| <b>1b</b>     |           |           |           | <b>2b</b>     |           |           |           |
|---------------|-----------|-----------|-----------|---------------|-----------|-----------|-----------|
| Atomic number | x         | y         | z         | Atomic number | x         | y         | z         |
| 78            | -0.910122 | -1.251887 | -0.743086 | 78            | -1.744085 | -0.327380 | -0.000052 |
| 8             | -0.871532 | 0.391788  | -1.957562 | 8             | 0.143607  | 0.439021  | 0.000011  |
| 8             | 1.095772  | -0.879837 | -0.665257 | 8             | -0.718142 | -2.088677 | -0.000223 |
| 7             | -2.952606 | -1.628596 | -0.843320 | 6             | 1.077023  | -0.514911 | -0.000065 |
| 7             | -0.955362 | -2.908089 | 0.514404  | 6             | 0.605657  | -1.876089 | -0.000191 |
| 6             | 1.416812  | 0.197610  | -1.400079 | 7             | -2.761322 | 1.482573  | 0.000017  |
| 6             | -3.351603 | -2.565316 | 0.254411  | 7             | -3.670974 | -1.104212 | -0.000021 |
| 6             | 0.363250  | 0.886843  | -2.095066 | 6             | -4.211047 | 1.276493  | 0.000141  |
| 6             | 0.669019  | 2.030121  | -2.873447 | 6             | -4.672318 | -0.034760 | 0.000110  |
| 6             | 2.034519  | 2.465288  | -2.945969 | 6             | -6.475996 | 2.078762  | 0.000389  |
| 6             | 3.031867  | 1.768059  | -2.263274 | 6             | -6.039095 | -0.305524 | 0.000212  |
| 6             | 2.733161  | 0.644217  | -1.495339 | 1             | -7.181242 | 2.903488  | 0.000503  |
| 6             | 1.369699  | 4.401107  | -4.436598 | 1             | -4.730717 | 3.362279  | 0.000313  |
| 6             | 0.027755  | 3.980229  | -4.373165 | 6             | -6.940514 | 0.758982  | 0.000351  |
| 6             | -0.955575 | 4.712817  | -5.051121 | 6             | -5.106573 | 2.343861  | 0.000283  |
| 1             | -1.986406 | 4.381452  | -4.997004 | 1             | -8.006857 | 0.558052  | 0.000432  |
| 6             | -0.612090 | 5.848336  | -5.780983 | 1             | -6.383802 | -1.334882 | 0.000183  |
| 6             | 0.722581  | 6.265040  | -5.843413 | 6             | 1.510474  | -2.934062 | -0.000276 |
| 6             | 1.707378  | 5.543154  | -5.174269 | 6             | 2.467659  | -0.254127 | -0.000031 |
| 1             | 4.055218  | 2.117931  | -2.337650 | 6             | 2.879435  | -2.675283 | -0.000245 |
| 1             | 3.513059  | 0.106252  | -0.964298 | 1             | 1.131517  | -3.951419 | -0.000369 |
| 1             | -1.382135 | 6.409622  | -6.301340 | 6             | 3.374010  | -1.369456 | -0.000124 |
| 1             | 0.990741  | 7.150036  | -6.412303 | 6             | 2.987112  | 1.116741  | 0.000102  |
| 1             | 2.746139  | 5.852333  | -5.212399 | 1             | 3.580636  | -3.501973 | -0.000311 |
| 6             | -0.375870 | 2.766622  | -3.599290 | 6             | 4.825673  | -1.179327 | -0.000086 |
| 8             | -1.573316 | 2.431813  | -3.599843 | 6             | 4.467445  | 1.307236  | 0.000140  |
| 6             | 2.432741  | 3.645325  | -3.726161 | 8             | 2.250393  | 2.125338  | 0.000226  |
| 8             | 3.617065  | 4.018557  | -3.798834 | 6             | 5.350042  | 0.208240  | 0.000050  |
| 6             | -2.267710 | -3.616957 | 0.379900  | 8             | 5.621187  | -2.146601 | -0.000128 |
| 1             | -0.188965 | -3.554603 | 0.324397  | 6             | 4.989163  | 2.607681  | 0.000274  |
| 1             | -0.838160 | -2.594044 | 1.479792  | 6             | 6.733975  | 0.428760  | 0.000095  |
| 1             | -2.219796 | -4.232600 | -0.521366 | 6             | 6.366183  | 2.817175  | 0.000318  |
| 1             | -2.441313 | -4.264752 | 1.242691  | 1             | 4.307405  | 3.450591  | 0.000345  |
| 1             | -3.433421 | -1.980984 | 1.173842  | 1             | 7.403684  | -0.423965 | 0.000025  |
| 1             | -3.502787 | -0.770811 | -0.787683 | 6             | 7.241239  | 1.725373  | 0.000228  |
| 1             | -3.168296 | -2.054437 | -1.746896 | 1             | 6.758445  | 3.829359  | 0.000424  |
| 1             | -4.321162 | -3.019459 | 0.035152  | 1             | 8.314627  | 1.887223  | 0.000262  |
|               |           |           |           | 1             | -2.494994 | 2.039136  | -0.817016 |
|               |           |           |           | 1             | -2.494857 | 2.039185  | 0.816971  |
|               |           |           |           | 1             | -3.813852 | -1.704228 | 0.817122  |
|               |           |           |           | 1             | -3.813954 | -1.704119 | -0.817227 |

| <b>3b-cis</b> |           |           |           | <b>3b-trans</b> |           |           |           |
|---------------|-----------|-----------|-----------|-----------------|-----------|-----------|-----------|
| Atomic number | x         | y         | z         | Atomic number   | x         | y         | z         |
| 78            | -1.977880 | -0.560751 | -0.103532 | 78              | -1.977880 | -0.560751 | -0.103532 |
| 7             | -3.884743 | -1.376659 | -0.159081 | 7               | -3.884743 | -1.376659 | -0.159081 |
| 7             | -3.079140 | 1.149859  | -0.081954 | 7               | -3.079140 | 1.149859  | -0.081954 |
| 8             | -0.885424 | -2.316613 | -0.049703 | 8               | -0.110965 | 0.266790  | -0.055351 |
| 8             | 0.041529  | 0.182562  | -0.199740 | 8               | -0.893108 | -2.285186 | -0.112787 |

|   |           |           |           |   |           |           |           |
|---|-----------|-----------|-----------|---|-----------|-----------|-----------|
| 1 | -4.136312 | -1.566376 | -1.131197 | 1 | -4.136312 | -1.566376 | -1.131197 |
| 6 | -4.858667 | -0.410101 | 0.429803  | 6 | -4.858667 | -0.410101 | 0.429803  |
| 1 | -3.941903 | -2.266236 | 0.337311  | 1 | -3.941903 | -2.266236 | 0.337311  |
| 6 | -4.412170 | 0.993003  | 0.131233  | 6 | -4.412170 | 0.993003  | 0.131233  |
| 6 | -2.572495 | 2.379818  | -0.316067 | 6 | -2.572495 | 2.379818  | -0.316067 |
| 1 | -4.864464 | -0.564930 | 1.512951  | 1 | -4.864464 | -0.564930 | 1.512951  |
| 1 | -5.866775 | -0.595164 | 0.052335  | 1 | -5.866775 | -0.595164 | 0.052335  |
| 6 | 0.442859  | -2.164951 | -0.068394 | 6 | 0.852133  | -0.660621 | -0.049102 |
| 6 | 0.936917  | -0.818391 | -0.147621 | 6 | 0.426513  | -2.032256 | -0.081657 |
| 6 | -5.272016 | 2.085726  | 0.109665  | 6 | -5.272016 | 2.085726  | 0.109665  |
| 6 | -3.382315 | 3.505886  | -0.336711 | 6 | -3.382315 | 3.505886  | -0.336711 |
| 1 | -1.504131 | 2.431912  | -0.486668 | 1 | -1.504131 | 2.431912  | -0.486668 |
| 6 | 1.358245  | -3.243907 | -0.014260 | 6 | 2.234922  | -0.357907 | -0.013513 |
| 6 | 2.307434  | -0.569576 | -0.170156 | 6 | 1.364234  | -3.062503 | -0.079621 |
| 6 | -4.753215 | 3.358254  | -0.121904 | 6 | -4.753215 | 3.358254  | -0.121904 |
| 1 | -6.332329 | 1.929903  | 0.274939  | 1 | -6.332329 | 1.929903  | 0.274939  |
| 1 | -2.938412 | 4.476553  | -0.524848 | 1 | -2.938412 | 4.476553  | -0.524848 |
| 6 | 0.896293  | -4.636525 | 0.066328  | 6 | 2.713982  | 1.030817  | 0.021507  |
| 6 | 2.762655  | -2.953566 | -0.040120 | 6 | 3.174301  | -1.441833 | -0.011600 |
| 6 | 3.206758  | -1.633131 | -0.116838 | 6 | 2.724901  | -2.762295 | -0.044497 |
| 1 | 2.657347  | 0.456839  | -0.229934 | 1 | 1.018628  | -4.091799 | -0.105050 |
| 1 | -5.410518 | 4.221199  | -0.139846 | 1 | -5.410518 | 4.221199  | -0.139846 |
| 6 | 1.926368  | -5.717684 | 0.119352  | 6 | 4.189205  | 1.265606  | 0.058401  |
| 8 | -0.304957 | -4.955232 | 0.092091  | 8 | 1.953229  | 2.013921  | 0.022070  |
| 6 | 3.774810  | -4.018210 | 0.011945  | 6 | 4.625246  | -1.209314 | 0.024879  |
| 1 | 4.274025  | -1.443472 | -0.134979 | 1 | 3.457586  | -3.561372 | -0.041982 |
| 6 | 3.303037  | -5.424225 | 0.093354  | 6 | 5.104643  | 0.196035  | 0.060189  |
| 6 | 1.508099  | -7.052510 | 0.197012  | 6 | 4.667889  | 2.581852  | 0.091556  |
| 8 | 4.993304  | -3.770064 | -0.010243 | 8 | 5.442557  | -2.146756 | 0.026603  |
| 6 | 4.237769  | -6.466383 | 0.144726  | 6 | 6.480416  | 0.457680  | 0.095484  |
| 6 | 2.443788  | -8.083048 | 0.247856  | 6 | 6.037369  | 2.833677  | 0.126414  |
| 1 | 0.445729  | -7.268258 | 0.216760  | 1 | 3.954955  | 3.398729  | 0.089601  |
| 6 | 3.812131  | -7.789941 | 0.221624  | 6 | 6.946391  | 1.769422  | 0.128464  |
| 1 | 5.294201  | -6.222261 | 0.123439  | 1 | 7.171394  | -0.378170 | 0.096620  |
| 1 | 2.109428  | -9.114223 | 0.307812  | 1 | 6.398224  | 3.857317  | 0.152063  |
| 1 | 4.541688  | -8.593006 | 0.261163  | 1 | 8.013900  | 1.965410  | 0.155710  |

| 4b-cis        |           |           |           | 4b-trans      |           |           |           |
|---------------|-----------|-----------|-----------|---------------|-----------|-----------|-----------|
| Atomic number | x         | y         | z         | Atomic number | x         | y         | z         |
| 78            | -0.852266 | -0.995129 | -0.324163 | 78            | -0.890696 | -1.167513 | -0.623704 |
| 8             | 1.098802  | -0.458298 | -0.041166 | 8             | -0.878050 | 0.421409  | -1.910598 |
| 8             | -0.801083 | 0.648325  | -1.538380 | 8             | 1.099272  | -0.733326 | -0.536915 |
| 7             | -2.794955 | -1.514071 | -0.589072 | 7             | -2.872643 | -1.602187 | -0.687192 |
| 7             | -0.909943 | -2.687683 | 0.897567  | 7             | -0.904477 | -2.789481 | 0.670423  |
| 6             | 0.401105  | 1.211108  | -1.546123 | 6             | 1.407158  | 0.309864  | -1.325824 |
| 6             | -3.264358 | -2.484925 | 0.221380  | 6             | -3.298068 | -2.532216 | 0.198727  |
| 6             | -2.320279 | -3.101968 | 1.213966  | 6             | -2.290142 | -3.124915 | 1.140640  |
| 6             | 1.436546  | 0.616529  | -0.733743 | 6             | 0.345132  | 0.939205  | -2.061080 |
| 6             | -4.585882 | -2.923530 | 0.175628  | 6             | -4.639186 | -2.909297 | 0.297088  |
| 6             | -4.939279 | -1.349649 | -1.611986 | 6             | -5.103713 | -1.366964 | -1.498606 |
| 1             | -3.182312 | -0.174537 | -2.112561 | 1             | -3.360033 | -0.293859 | -2.219742 |
| 6             | -5.431191 | -2.345304 | -0.769009 | 6             | -5.550948 | -2.315498 | -0.577020 |



|   |           |           |           |   |           |           |           |
|---|-----------|-----------|-----------|---|-----------|-----------|-----------|
| 1 | -5.572090 | -0.880241 | -2.353552 | 1 | -5.787606 | -0.888611 | -2.190344 |
| 1 | -6.464141 | -2.665476 | -0.841610 | 1 | -6.600360 | -2.591286 | -0.535765 |
| 6 | 2.728152  | 1.195182  | -0.716403 | 6 | 0.631988  | 2.049493  | -2.891703 |
| 6 | 2.971038  | 2.361317  | -1.519446 | 6 | 1.989290  | 2.504975  | -2.983564 |
| 6 | 1.946102  | 2.904646  | -2.292463 | 6 | 2.996583  | 1.863810  | -2.261719 |
| 6 | 0.672825  | 2.342767  | -2.310220 | 6 | 2.715048  | 0.776444  | -1.436508 |
| 6 | 5.372797  | 2.440169  | -0.729571 | 6 | 1.294564  | 4.335183  | -4.590034 |
| 6 | 5.144132  | 1.302552  | 0.061583  | 6 | -0.041153 | 3.899043  | -4.499923 |
| 6 | 6.190154  | 0.782508  | 0.833250  | 6 | -1.034212 | 4.569662  | -5.225987 |
| 1 | 6.002077  | -0.094774 | 1.438880  | 1 | -2.060314 | 4.228131  | -5.150045 |
| 6 | 7.444335  | 1.382056  | 0.820351  | 6 | -0.706229 | 5.657759  | -6.031373 |
| 6 | 7.670217  | 2.514960  | 0.032076  | 6 | 0.622151  | 6.089305  | -6.120737 |
| 6 | 6.638663  | 3.038819  | -0.737547 | 6 | 1.616271  | 5.430037  | -5.402488 |
| 1 | 2.159087  | 3.783750  | -2.887152 | 1 | 4.013751  | 2.227823  | -2.351308 |
| 1 | -0.121292 | 2.769864  | -2.912282 | 1 | 3.501905  | 0.282026  | -0.874357 |
| 1 | 8.246729  | 0.970559  | 1.421928  | 1 | -1.483528 | 6.170499  | -6.589647 |
| 1 | 8.647507  | 2.983699  | 0.021225  | 1 | 0.878210  | 6.937360  | -6.748399 |
| 1 | 6.794078  | 3.915092  | -1.354142 | 1 | 2.650127  | 5.752334  | -5.459688 |
| 6 | 3.805216  | 0.624873  | 0.105375  | 6 | -0.426587 | 2.733906  | -3.646929 |
| 8 | 3.668064  | -0.368311 | 0.822493  | 8 | -1.621214 | 2.392200  | -3.607603 |
| 6 | 4.282809  | 3.019414  | -1.562698 | 6 | 2.367791  | 3.646748  | -3.828175 |
| 8 | 4.501928  | 4.019609  | -2.256752 | 8 | 3.544211  | 4.040905  | -3.914649 |
| 1 | -0.436993 | -3.442883 | 0.401215  | 1 | -0.511329 | -3.591977 | 0.173924  |
| 1 | -0.390224 | -2.547728 | 1.761317  | 1 | -0.300850 | -2.628891 | 1.477407  |
| 6 | -3.618239 | -0.949030 | -1.496147 | 6 | -3.759088 | -1.026977 | -1.529830 |
| 6 | -4.994071 | -3.956207 | 1.190529  | 6 | -4.980895 | -3.930755 | 1.348992  |
| 6 | -2.479977 | -4.632761 | 1.217743  | 6 | -2.485032 | -4.646841 | 1.330922  |
| 1 | -1.879955 | -5.046240 | 2.030372  | 1 | -1.992786 | -4.933863 | 2.264054  |
| 6 | -3.958274 | -5.097951 | 1.326239  | 6 | -3.972614 | -5.097821 | 1.325791  |
| 1 | -4.123723 | -5.599152 | 2.281247  | 1 | -4.165283 | -5.752006 | 2.180074  |
| 1 | -5.095260 | -3.449168 | 2.157778  | 1 | -4.956829 | -3.445224 | 2.334343  |
| 1 | -2.554502 | -2.697236 | 2.203001  | 1 | -2.418299 | -2.623149 | 2.106558  |
| 1 | -2.052460 | -5.003189 | 0.281134  | 1 | -1.956220 | -5.157464 | 0.518396  |
| 1 | -4.147460 | -5.836741 | 0.545254  | 1 | -4.160790 | -5.689015 | 0.424439  |
| 1 | -5.977402 | -4.362593 | 0.948585  | 1 | -5.998735 | -4.301182 | 1.200603  |

| 5b-cis        |           |           |           | 5b-trans      |           |           |           |
|---------------|-----------|-----------|-----------|---------------|-----------|-----------|-----------|
| Atomic number | x         | y         | z         | Atomic number | x         | y         | z         |
| 78            | -0.932845 | -1.068768 | -0.904391 | 78            | -1.069411 | -1.256320 | -0.985069 |
| 8             | 1.079153  | -0.759899 | -0.829723 | 8             | -0.943402 | 0.482438  | -2.083992 |
| 8             | -0.804558 | 0.610603  | -2.091133 | 8             | 0.949152  | -1.033733 | -0.994577 |
| 7             | -0.923203 | -2.707943 | 0.363490  | 7             | -1.070554 | -2.944807 | 0.195156  |
| 7             | -2.962210 | -1.536913 | -0.885620 | 7             | -3.116102 | -1.629553 | -0.859449 |
| 6             | 1.478162  | 0.291617  | -1.524891 | 6             | 0.315484  | 0.896005  | -2.231580 |
| 6             | -3.301526 | -2.436444 | 0.083933  | 6             | -3.430815 | -2.515579 | 0.134848  |
| 6             | -2.223812 | -2.717773 | 1.105715  | 6             | -2.291181 | -2.876414 | 1.057943  |
| 6             | 0.444032  | 1.034088  | -2.202584 | 6             | 1.336856  | 0.073177  | -1.647755 |
| 6             | -4.550063 | -3.041983 | 0.143889  | 6             | -4.707945 | -3.048232 | 0.293199  |
| 6             | -5.179919 | -1.679301 | -1.734523 | 6             | -5.394870 | -1.665286 | -1.555280 |
| 6             | -5.506297 | -2.634762 | -0.788763 | 6             | -5.706429 | -2.592326 | -0.573386 |
| 1             | -5.910766 | -1.352227 | -2.462475 | 1             | -6.154727 | -1.306383 | -2.240054 |
| 1             | -6.495359 | -3.078887 | -0.777581 | 1             | -6.716728 | -2.981302 | -0.486015 |
| 6             | 2.825679  | 0.706200  | -1.631784 | 6             | 0.684454  | 2.077434  | -2.923422 |
| 6             | 3.125568  | 1.872652  | -2.414693 | 6             | 2.077660  | 2.407636  | -3.020906 |
| 6             | 2.098780  | 2.570705  | -3.049959 | 6             | 3.040633  | 1.579181  | -2.444234 |
| 6             | 0.772012  | 2.163110  | -2.951335 | 6             | 2.680795  | 0.419069  | -1.760193 |

|   |           |           |           |   |           |           |           |
|---|-----------|-----------|-----------|---|-----------|-----------|-----------|
| 6 | 5.589564  | 1.609084  | -1.909836 | 6 | 1.521284  | 4.502752  | -4.330330 |
| 6 | 5.305882  | 0.466646  | -1.143434 | 6 | 0.152349  | 4.187719  | -4.237171 |
| 6 | 6.356118  | -0.226325 | -0.529683 | 6 | -0.791767 | 5.043178  | -4.820084 |
| 1 | 6.124303  | -1.105132 | 0.058399  | 1 | -1.843656 | 4.792072  | -4.742804 |
| 6 | 7.669172  | 0.206678  | -0.674692 | 6 | -0.383067 | 6.195723  | -5.486908 |
| 6 | 7.950060  | 1.344556  | -1.437670 | 6 | 0.978317  | 6.507317  | -5.579032 |
| 6 | 6.914469  | 2.040088  | -2.050022 | 6 | 1.924438  | 5.663729  | -5.002904 |
| 1 | 2.355069  | 3.446839  | -3.631951 | 1 | 4.085176  | 1.854689  | -2.535393 |
| 1 | -0.021903 | 2.708026  | -3.449588 | 1 | 3.432900  | -0.222606 | -1.310541 |
| 1 | 8.474641  | -0.338409 | -0.195999 | 1 | -1.122789 | 6.852013  | -5.935132 |
| 1 | 8.973268  | 1.683703  | -1.551558 | 1 | 1.297343  | 7.405450  | -6.098962 |
| 1 | 7.112788  | 2.922992  | -2.644476 | 1 | 2.982912  | 5.891357  | -5.065356 |
| 6 | 3.903121  | -0.035195 | -0.962202 | 6 | -0.322039 | 2.959034  | -3.530047 |
| 8 | 3.715666  | -1.037178 | -0.269154 | 8 | -1.544130 | 2.735325  | -3.482714 |
| 6 | 4.496465  | 2.369067  | -2.578481 | 6 | 2.542928  | 3.613769  | -3.721072 |
| 8 | 4.763770  | 3.377690  | -3.243459 | 8 | 3.750552  | 3.897985  | -3.810916 |
| 1 | -0.808371 | -3.572784 | -0.166245 | 1 | -1.088777 | -3.799337 | -0.367726 |
| 1 | -0.144236 | -2.658642 | 1.018406  | 1 | -0.235269 | -2.993579 | 0.781191  |
| 6 | -3.889082 | -1.148476 | -1.793921 | 6 | -4.083726 | -1.202356 | -1.711212 |
| 6 | -4.805828 | -4.145358 | 1.141605  | 6 | -4.949100 | -4.133142 | 1.315705  |
| 6 | -2.449662 | -3.974772 | 1.976280  | 6 | -2.515723 | -4.131506 | 1.932705  |
| 1 | -2.763151 | -3.644968 | 2.970261  | 1 | -2.702793 | -3.795544 | 2.957760  |
| 6 | -3.512422 | -4.920999 | 1.413082  | 6 | -3.692704 | -4.997425 | 1.474737  |
| 1 | -3.695328 | -5.729009 | 2.124775  | 1 | -3.867573 | -5.790712 | 2.207742  |
| 1 | -5.185212 | -3.723044 | 2.080093  | 1 | -5.211900 | -3.687542 | 2.284996  |
| 1 | -2.174301 | -1.840289 | 1.755694  | 1 | -2.120305 | -2.015921 | 1.712700  |
| 1 | -1.495531 | -4.491671 | 2.107720  | 1 | -1.588076 | -4.713439 | 1.957894  |
| 1 | -3.163834 | -5.380880 | 0.481966  | 1 | -3.462718 | -5.482668 | 0.517867  |
| 1 | -5.586110 | -4.804132 | 0.753833  | 1 | -5.807712 | -4.733910 | 1.001069  |
| 6 | -3.511276 | -0.162696 | -2.853767 | 6 | -3.746626 | -0.247622 | -2.813848 |
| 1 | -3.184893 | 0.777500  | -2.407960 | 1 | -3.471596 | 0.731593  | -2.413055 |
| 1 | -2.668138 | -0.530322 | -3.441753 | 1 | -2.900557 | -0.608415 | -3.403731 |
| 1 | -4.357244 | 0.023696  | -3.514387 | 1 | -4.609794 | -0.123303 | -3.470243 |

| 6b-cis        |           |           |           | 6b-trans      |           |           |           |
|---------------|-----------|-----------|-----------|---------------|-----------|-----------|-----------|
| Atomic number | x         | y         | z         | Atomic number | x         | y         | z         |
| 78            | -1.226543 | -1.221490 | -0.836721 | 78            | -0.893505 | -1.249289 | -0.737509 |
| 8             | -1.076310 | 0.427237  | -2.029531 | 8             | -0.865276 | 0.404972  | -1.924909 |
| 8             | 0.777548  | -0.908063 | -0.653501 | 8             | 1.111304  | -0.896508 | -0.690870 |
| 7             | -3.282929 | -1.527586 | -1.031735 | 7             | -0.926153 | -2.941790 | 0.481746  |
| 7             | -1.395428 | -2.857696 | 0.351024  | 7             | -2.891372 | -1.603578 | -0.777674 |
| 6             | 0.175362  | 0.887179  | -2.106081 | 6             | 0.371572  | 0.889035  | -2.088447 |
| 6             | -2.680197 | -3.346988 | 0.465527  | 6             | -3.287803 | -2.699963 | -0.041507 |
| 6             | -3.702902 | -2.683006 | -0.239187 | 6             | -2.293962 | -3.433636 | 0.635161  |
| 6             | 1.170408  | 0.161685  | -1.359372 | 6             | 1.431303  | 0.185781  | -1.422531 |
| 6             | -2.977219 | -4.481451 | 1.265657  | 6             | -4.651051 | -3.089519 | 0.041726  |
| 6             | -0.626600 | -4.594601 | 1.812113  | 6             | -5.175539 | -1.216106 | -1.390926 |
| 1             | 0.584469  | -3.039442 | 0.879062  | 1             | -3.443846 | -0.037113 | -1.992438 |
| 6             | -1.899900 | -5.103171 | 1.946485  | 6             | -5.600054 | -2.306044 | -0.663548 |
| 1             | 0.219361  | -5.045050 | 2.317540  | 1             | -5.873320 | -0.595875 | -1.941096 |
| 1             | -2.093235 | -5.973493 | 2.565651  | 1             | -6.650691 | -2.575590 | -0.620780 |
| 6             | 0.555718  | 2.019734  | -2.864297 | 6             | 0.669767  | 2.032660  | -2.867766 |
| 6             | 1.937742  | 2.414343  | -2.858668 | 6             | 2.036713  | 2.455660  | -2.965838 |
| 6             | 2.873333  | 1.685176  | -2.122090 | 6             | 3.041931  | 1.746741  | -2.307022 |
| 6             | 2.501451  | 0.568119  | -1.377554 | 6             | 2.749365  | 0.620404  | -1.539927 |

|   |           |           |           |   |           |           |           |
|---|-----------|-----------|-----------|---|-----------|-----------|-----------|
| 6 | 1.415213  | 4.357714  | -4.390438 | 6 | 1.357659  | 4.401079  | -4.438999 |
| 6 | 0.058847  | 3.974962  | -4.404656 | 6 | 0.013832  | 3.990623  | -4.350696 |
| 6 | -0.859912 | 4.729348  | -5.146373 | 6 | -0.976539 | 4.731326  | -5.009153 |
| 1 | -1.902535 | 4.432772  | -5.154699 | 1 | -2.008704 | 4.407894  | -4.935939 |
| 6 | -0.441331 | 5.847347  | -5.863948 | 6 | -0.638109 | 5.864901  | -5.744412 |
| 6 | 0.905668  | 6.225677  | -5.849411 | 6 | 0.698271  | 6.271441  | -5.831463 |
| 6 | 1.827546  | 5.483390  | -5.116102 | 6 | 1.690049  | 5.541394  | -5.181651 |
| 1 | 3.910301  | 2.000496  | -2.133340 | 1 | 4.066478  | 2.088333  | -2.400394 |
| 1 | 3.232864  | 0.004346  | -0.806773 | 1 | 3.534904  | 0.071906  | -1.028460 |
| 1 | -1.162833 | 6.424179  | -6.434169 | 1 | -1.413448 | 6.432495  | -6.249816 |
| 1 | 1.233261  | 7.096713  | -6.408300 | 1 | 0.962459  | 7.154940  | -6.404495 |
| 1 | 2.873481  | 5.768506  | -5.097973 | 1 | 2.730167  | 5.842844  | -5.239357 |
| 6 | -0.422473 | 2.782132  | -3.647173 | 6 | -0.384231 | 2.779793  | -3.570282 |
| 8 | -1.632316 | 2.479214  | -3.709631 | 8 | -1.583548 | 2.454109  | -3.545514 |
| 6 | 2.408562  | 3.578403  | -3.612397 | 6 | 2.428468  | 3.635824  | -3.750639 |
| 8 | 3.611887  | 3.924620  | -3.612715 | 8 | 3.613773  | 3.999561  | -3.844713 |
| 1 | -3.798195 | -0.695997 | -0.729874 | 1 | -0.333985 | -3.674721 | 0.082190  |
| 1 | -3.530057 | -1.673098 | -2.014658 | 1 | -0.528333 | -2.723916 | 1.399195  |
| 6 | -0.405406 | -3.463361 | 1.002987  | 6 | -3.805959 | -0.888881 | -1.428467 |
| 6 | -4.325568 | -4.918835 | 1.333721  | 6 | -4.976341 | -4.230663 | 0.820558  |
| 6 | -5.003115 | -3.122084 | -0.160544 | 6 | -2.630137 | -4.537067 | 1.384613  |
| 1 | -5.785315 | -2.603832 | -0.706193 | 1 | -1.859165 | -5.098317 | 1.903685  |
| 6 | -5.310974 | -4.252113 | 0.636418  | 6 | -3.986853 | -4.934383 | 1.473829  |
| 1 | -6.340152 | -4.590119 | 0.692013  | 1 | -4.240409 | -5.806156 | 2.067475  |
| 1 | -4.563187 | -5.784925 | 1.943057  | 1 | -6.015429 | -4.536189 | 0.890557  |

| 7b            |           |           |           | 8b            |           |           |           |
|---------------|-----------|-----------|-----------|---------------|-----------|-----------|-----------|
| Atomic number | x         | y         | z         | Atomic number | x         | y         | z         |
| 78            | -1.521037 | -0.268502 | -0.002590 | 78            | -0.898044 | -1.360968 | -0.876509 |
| 8             | 0.401782  | 0.403815  | -0.010286 | 8             | -0.872272 | 0.353199  | -1.970027 |
| 8             | -0.573824 | -2.069781 | 0.003373  | 8             | 1.108098  | -1.044281 | -0.865796 |
| 7             | -2.483821 | 1.514976  | -0.006959 | 7             | -0.957475 | -3.082286 | 0.218011  |
| 7             | -3.448292 | -0.897029 | 0.006342  | 7             | -2.911048 | -1.692541 | -0.880968 |
| 6             | 0.761991  | -1.925694 | 0.000689  | 6             | 0.368994  | 0.826783  | -2.142905 |
| 6             | -3.847672 | 1.452172  | -0.000015 | 6             | -3.275752 | -2.822985 | -0.202425 |
| 6             | 1.294510  | -0.593520 | -0.003826 | 6             | 1.431151  | 0.069003  | -1.547226 |
| 6             | -4.610237 | 2.618934  | 0.002716  | 6             | -4.613788 | -3.245709 | -0.080706 |
| 6             | -2.574758 | 3.900869  | -0.012295 | 6             | -5.216232 | -1.302287 | -1.379991 |
| 1             | -0.778553 | 2.683752  | -0.018336 | 1             | -3.529205 | -0.061773 | -1.984721 |
| 6             | -3.968328 | 3.854887  | -0.003218 | 6             | -5.599754 | -2.442900 | -0.697323 |
| 1             | -2.037203 | 4.841804  | -0.016956 | 1             | -5.947559 | -0.665341 | -1.863674 |
| 1             | -4.551639 | 4.769222  | -0.000553 | 1             | -6.645005 | -2.727267 | -0.630201 |
| 6             | 2.696625  | -0.397958 | -0.001988 | 6             | 0.668828  | 2.005707  | -2.867018 |
| 6             | 3.546255  | -1.553028 | -0.003995 | 6             | 2.041387  | 2.402122  | -2.986764 |
| 6             | 2.993762  | -2.834578 | -0.003257 | 6             | 3.049664  | 1.639848  | -2.395333 |
| 6             | 1.613692  | -3.027807 | 0.000466  | 6             | 2.754822  | 0.481885  | -1.678467 |
| 6             | 5.604150  | -0.075356 | -0.000555 | 6             | 1.368400  | 4.424549  | -4.356686 |
| 6             | 4.777336  | 1.064034  | 0.006053  | 6             | 0.017736  | 4.045232  | -4.239779 |
| 6             | 5.360788  | 2.337778  | 0.012749  | 6             | -0.972749 | 4.831788  | -4.842346 |
| 1             | 4.716194  | 3.209471  | 0.018017  | 1             | -2.010256 | 4.532081  | -4.746735 |
| 6             | 6.746498  | 2.479014  | 0.012547  | 6             | -0.627310 | 5.979352  | -5.552244 |
| 6             | 7.567100  | 1.345338  | 0.005936  | 6             | 0.715870  | 6.355126  | -5.667551 |
| 6             | 6.996877  | 0.074996  | -0.000423 | 6             | 1.707679  | 5.580357  | -5.071691 |
| 1             | 3.661409  | -3.688585 | -0.005050 | 1             | 4.078219  | 1.964785  | -2.502773 |
| 1             | 1.187682  | -4.026780 | 0.002516  | 1             | 3.541934  | -0.108651 | -1.218979 |
| 1             | 7.188631  | 3.470599  | 0.017458  | 1             | -1.402430 | 6.581689  | -6.016058 |

|   |           |           |           |   |           |           |           |
|---|-----------|-----------|-----------|---|-----------|-----------|-----------|
| 1 | 8.647239  | 1.455061  | 0.005866  | 1 | 0.985406  | 7.249602  | -6.220713 |
| 1 | 7.619021  | -0.813228 | -0.005290 | 1 | 2.752856  | 5.858293  | -5.151658 |
| 6 | 3.287233  | 0.949322  | 0.005920  | 6 | -0.388359 | 2.820101  | -3.486449 |
| 8 | 2.609627  | 1.991003  | 0.014957  | 8 | -1.596601 | 2.539936  | -3.411430 |
| 6 | 5.012621  | -1.437537 | -0.007335 | 6 | 2.438600  | 3.609239  | -3.728026 |
| 8 | 5.750524  | -2.438031 | -0.015744 | 8 | 3.628771  | 3.951212  | -3.836510 |
| 6 | -1.861368 | 2.708985  | -0.013154 | 6 | -3.859280 | -0.948591 | -1.456797 |
| 6 | -4.392760 | 0.088882  | 0.003971  | 6 | -2.223317 | -3.571929 | 0.389132  |
| 6 | -5.749611 | -0.230658 | 0.003653  | 6 | -2.498243 | -4.751549 | 1.108081  |
| 6 | -6.137054 | -1.568344 | 0.008097  | 6 | -1.395153 | -5.435660 | 1.666451  |
| 6 | -3.821243 | -2.190822 | 0.011366  | 6 | 0.070557  | -3.744582 | 0.755351  |
| 6 | -5.159496 | -2.562593 | 0.012787  | 6 | -0.120794 | -4.927844 | 1.487136  |
| 1 | -3.019319 | -2.918965 | 0.013814  | 1 | 1.056847  | -3.324320 | 0.598303  |
| 1 | -5.418942 | -3.614712 | 0.016922  | 1 | 0.746141  | -5.427663 | 1.903126  |
| 1 | -7.190007 | -1.828220 | 0.007787  | 1 | -1.557081 | -6.349550 | 2.229073  |
| 1 | -6.493498 | 0.556457  | -0.000753 | 6 | -4.879773 | -4.451367 | 0.655017  |
| 1 | -5.691674 | 2.561734  | 0.011118  | 6 | -3.867738 | -5.171772 | 1.223396  |
|   |           |           |           | 1 | -4.080363 | -6.080690 | 1.776949  |
|   |           |           |           | 1 | -5.910411 | -4.777868 | 0.749095  |

**9b**

| Atomic number | x         | y         | z         |
|---------------|-----------|-----------|-----------|
| 78            | 1.396880  | 1.983418  | -1.464109 |
| 8             | 1.436986  | 3.692045  | -2.563085 |
| 8             | 3.403709  | 2.287510  | -1.447961 |
| 7             | -0.615253 | 1.662361  | -1.471716 |
| 7             | 1.318041  | 0.269910  | -0.363373 |
| 6             | 3.736798  | 3.396729  | -2.131861 |
| 6             | -0.999548 | 0.543681  | -0.791007 |
| 6             | 2.681565  | 4.158929  | -2.732733 |
| 6             | -2.339706 | 0.148749  | -0.681850 |
| 6             | -2.905605 | 2.087462  | -1.995181 |
| 1             | -1.196673 | 3.297430  | -2.591833 |
| 6             | -3.309507 | 0.954313  | -1.306481 |
| 1             | -3.626704 | 2.729166  | -2.487627 |
| 1             | -4.356378 | 0.683219  | -1.244692 |
| 6             | 2.990094  | 5.334589  | -3.458018 |
| 6             | 4.365164  | 5.722227  | -3.574820 |
| 6             | 5.367280  | 4.955097  | -2.979105 |
| 6             | 5.063443  | 3.800695  | -2.260168 |
| 6             | 3.707559  | 7.746349  | -4.950118 |
| 6             | 2.354262  | 7.375812  | -4.835256 |
| 6             | 1.369924  | 8.167347  | -5.441289 |
| 1             | 0.330382  | 7.874264  | -5.347088 |
| 6             | 1.724053  | 9.311301  | -6.152757 |
| 6             | 3.069810  | 9.678320  | -6.266133 |
| 6             | 4.055561  | 8.898520  | -5.666745 |
| 1             | 6.398063  | 5.273551  | -3.084636 |
| 1             | 5.845578  | 3.206507  | -1.796935 |
| 1             | 0.953708  | 9.917635  | -6.619304 |
| 1             | 3.346079  | 10.569948 | -6.820558 |
| 1             | 5.102646  | 9.169665  | -5.745168 |
| 6             | 1.939056  | 6.154691  | -4.080653 |
| 8             | 0.729123  | 5.882110  | -4.006651 |
| 6             | 4.771380  | 6.925645  | -4.317591 |
| 8             | 5.963810  | 7.259851  | -4.423971 |

---

|   |           |           |           |
|---|-----------|-----------|-----------|
| 6 | -1.547961 | 2.419863  | -2.062480 |
| 6 | 0.055151  | -0.216377 | -0.187417 |
| 6 | -0.209698 | -1.386799 | 0.536341  |
| 6 | 0.885937  | -2.070117 | 1.094953  |
| 6 | 2.351801  | -0.389056 | 0.174978  |
| 6 | 2.163270  | -1.564370 | 0.910640  |
| 1 | 3.335601  | 0.033897  | 0.010638  |
| 1 | 3.028741  | -2.065119 | 1.328291  |
| 1 | 0.721955  | -2.979201 | 1.660668  |
| 6 | -2.640253 | -1.065967 | 0.067780  |
| 6 | -1.597314 | -1.818165 | 0.663270  |
| 6 | -3.131532 | -3.308484 | 1.455169  |
| 6 | -4.166159 | -2.562179 | 0.864706  |
| 1 | -3.357214 | -4.213565 | 2.012013  |
| 1 | -5.198909 | -2.884987 | 0.961119  |
| 7 | -1.859367 | -2.945117 | 1.359245  |
| 7 | -3.929291 | -1.452562 | 0.177453  |

---

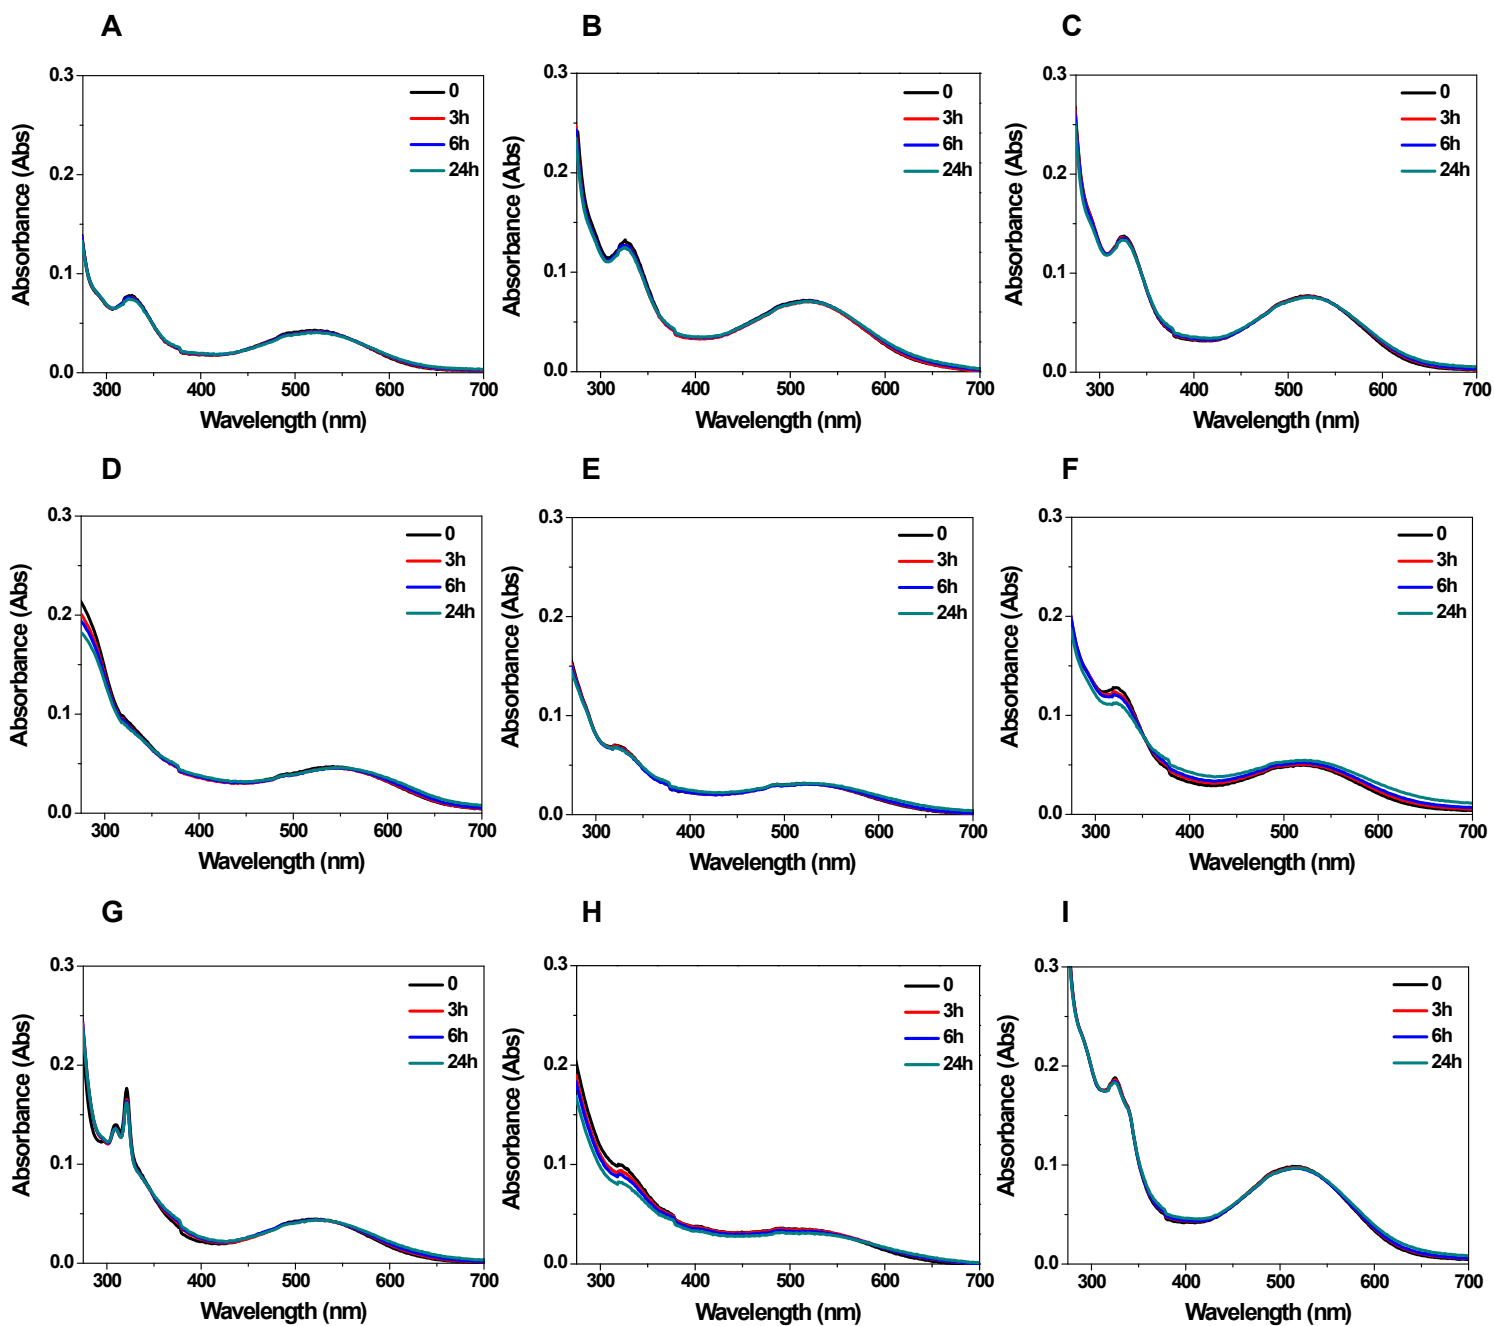

**Figure S18.** Absorption spectra over time ( $t = 0, 3, 6,$  and  $24$  h) of Pt(II) complexes  $[(N^N)Pt(aliz)]$  (A) **1b**, (B) **2b**, (C) **3b**, (D) **4b**, (E) **5b**, (F) **6b**, (G) **7b**, (H) **8b** and of (I) **9b** in DMSO/buffer solution (DMSO 0.5% v/v) at room temperature,  $1 \cdot 10^{-5}M$ .

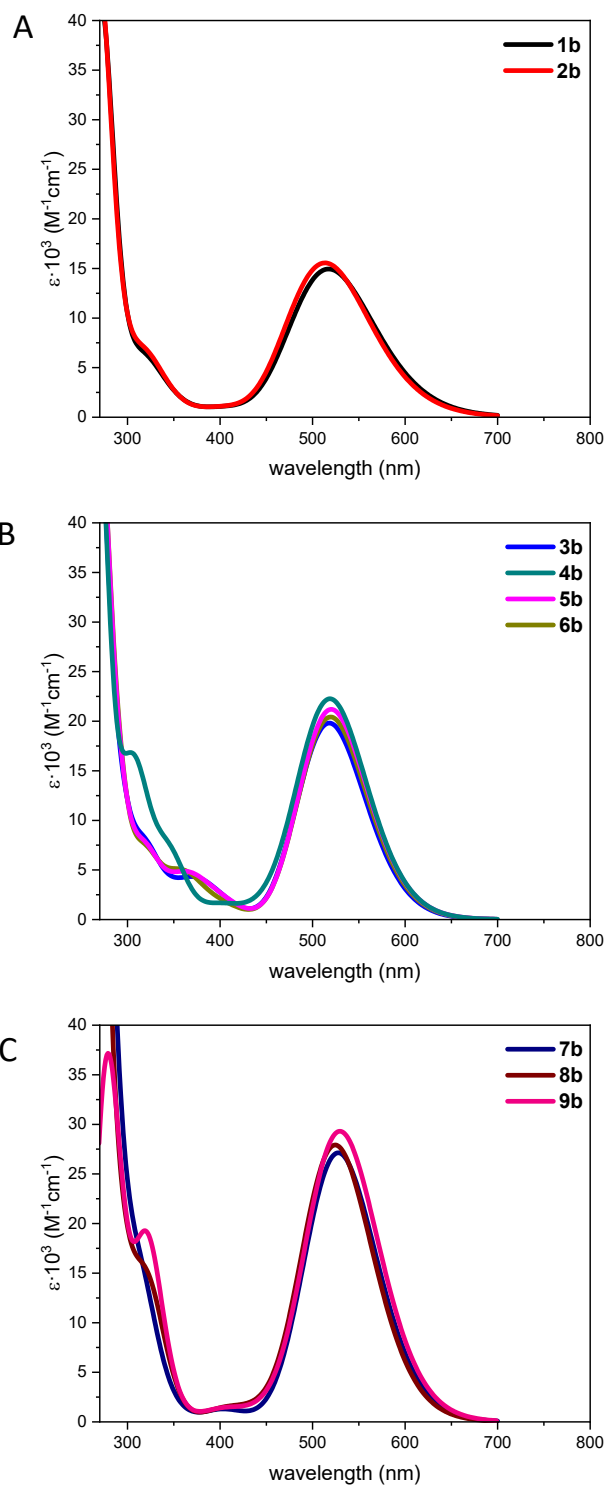

**Figure S19.** TDDFT simulated absorption spectra of Pt(II) complexes **1b-2b** (A), **3b-6b** (B), **7b-9b** (C) in aqueous environment.

**Table TS4.** TDDFT calculated electronic excitation energies (eV), absorption wavelength (nm), oscillator strength ( $f$ ) and main configuration in water.

|           | Band | energy | wavelength | Main configuration | $f$   | <i>Theoretical Assignment</i> |
|-----------|------|--------|------------|--------------------|-------|-------------------------------|
| <b>1b</b> | I    | 2.40   | 517        | H→L (99%)          | 0.277 | ML <sub>aliz</sub> CT         |
|           | II   | 3.91   | 318        | H-4→L (80%)        | 0.072 | IL <sub>aliz</sub> CT         |
| <b>2b</b> | I    | 2.42   | 513        | H→L (99%)          | 0.288 | ML <sub>aliz</sub> CT         |
|           | II   | 3.90   | 318        | H-4→L (70%)        | 0.075 | IL <sub>aliz</sub> CT         |
| <b>3b</b> | I    | 2.39   | 518        | H→L (99%)          | 0.294 | ML <sub>aliz</sub> CT         |
|           | II   | 3.90   | 318        | H-5→L (88%)        | 0.070 | IL <sub>aliz</sub> CT         |
| <b>4b</b> | I    | 2.39   | 519        | H→L (99%)          | 0.303 | ML <sub>aliz</sub> CT         |
|           | II   | 3.90   | 318        | H-5→L (82%)        |       | IL <sub>aliz</sub> CT         |
| 5b        | I    | 2.38   | 520        | H→L (99%)          | 0.314 | ML <sub>aliz</sub> CT         |
|           | II   | 3.91   | 318        | H-6→L (87%)        | 0.075 | IL <sub>aliz</sub> CT         |
| 6b        | I    | 2.39   | 520        | H→L (99%)          | 0.325 | ML <sub>aliz</sub> CT         |
|           | II   | 3.89   | 319        | H-5→L (65%)        | 0.064 | IL <sub>aliz</sub> CT         |
| 7b        | I    | 2.34   | 529        | H→L (93%)          | 0.396 | MLCT                          |
|           | II   | 3.89   | 319        | H-5→L (78%)        | 0.076 | IL <sub>aliz</sub> CT         |
| 8b        | I    | 2.34   | 531        | H→L (92%)          | 0.422 | MLCT                          |
|           | II   | 3.83   | 324        | H-5→L (78%)        | 0.101 | IL <sub>aliz</sub> CT         |
| 9b        | I    | 2.36   | 525        | H→L (94%)          | 0.410 | MLCT                          |
|           | II   | 3.88   | 319        | H-4→L (59%)        | 0.102 | MLCT/LLCT                     |

<sup>a</sup>Only selected excited states were considered.



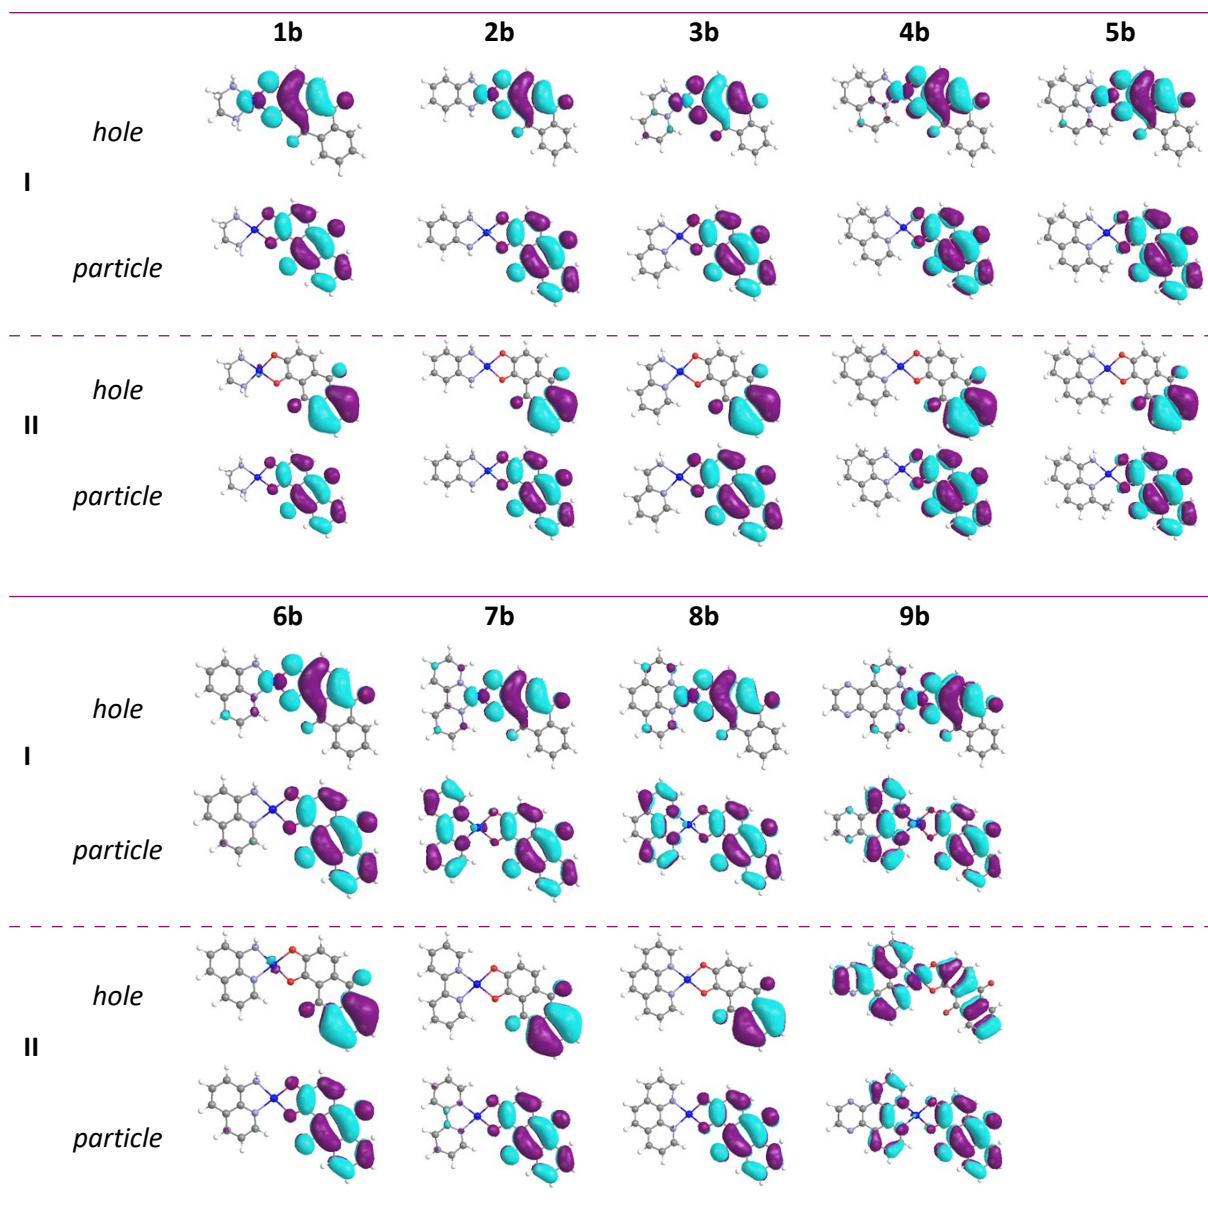

**Figure S20.** Natural Transition Orbitals (NTOs) for selected electronic transitions.

A

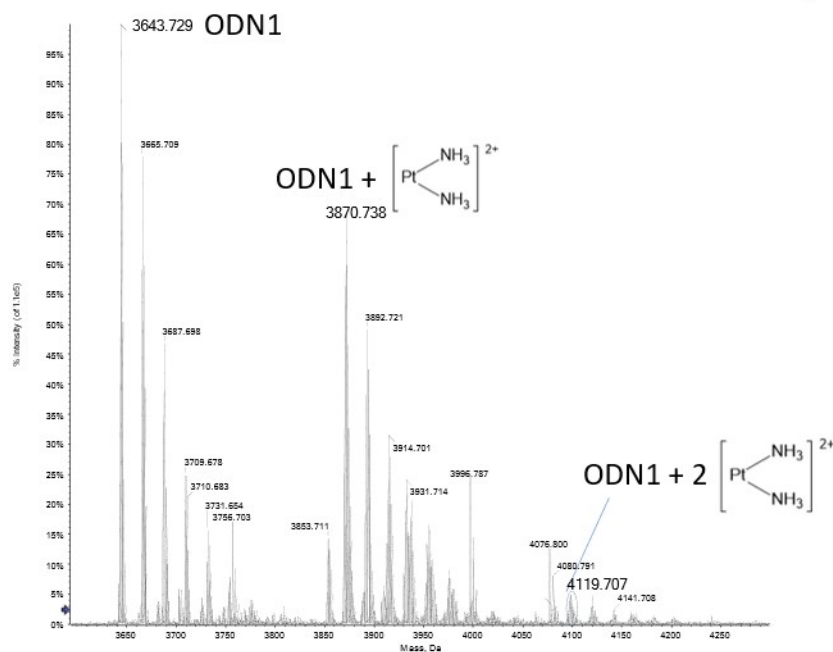

B

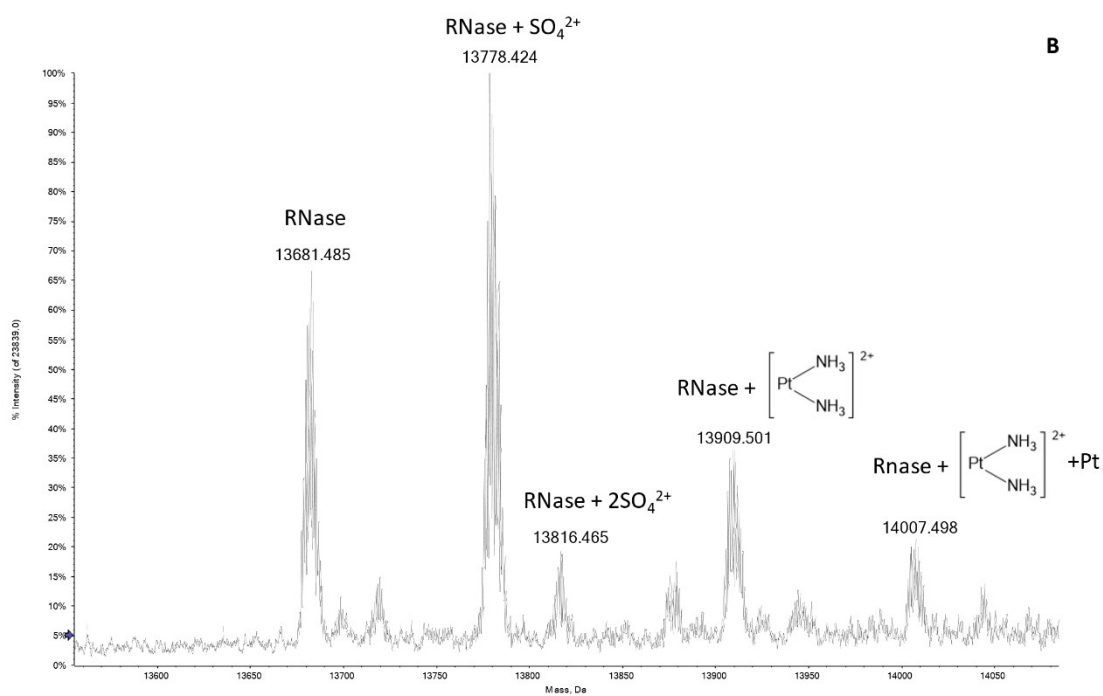

**Figure S21. (A)** Deconvoluted ESI-Q-TOF spectra of ODN with cisplatin; **(B)** Deconvoluted ESI-Q-TOF spectra of RNase with cisplatin in a 1:1 molecule to platinum ratio. All spectra were recorded at 24 h.

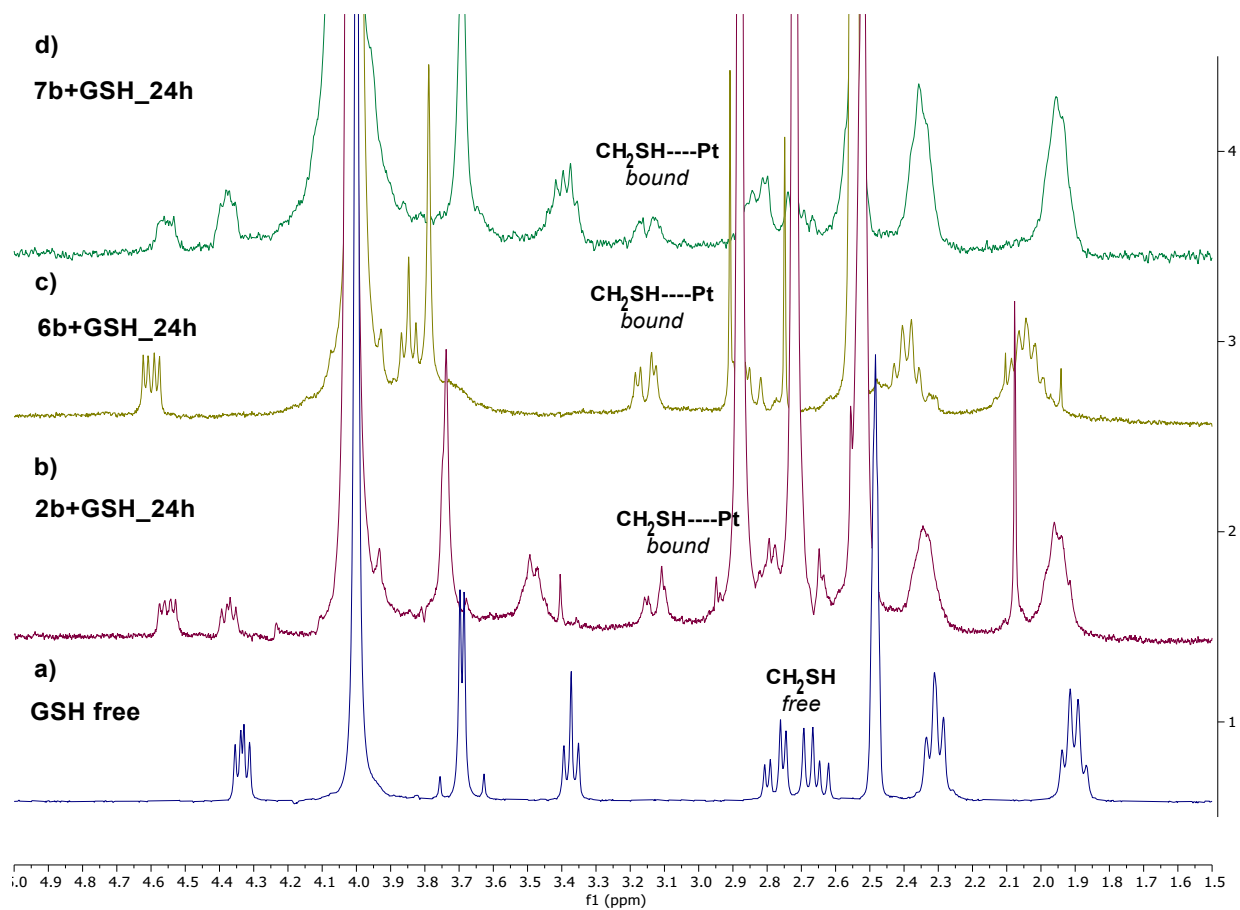

**Figure S22.** Binding study of GSH with compounds **2b**, **6b** and **7b** in 20 % physiological D<sub>2</sub>O solution-DMSO-*d*<sub>6</sub>: stack plot of <sup>1</sup>H-NMR for aliphatic region.

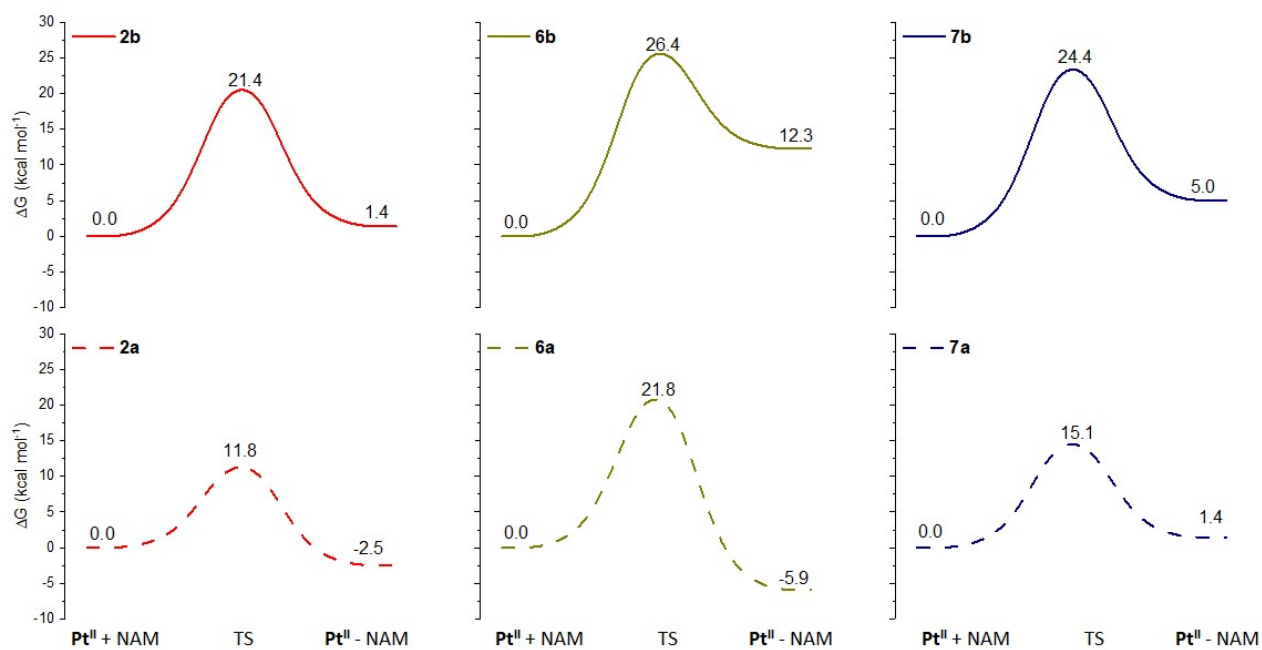

**Figure S23.** Free energy profiles for NAM attack to Pt<sup>II</sup> complexes **2b**, **6b**, **7b**, **2a**, **6a** and **7a**.
